# Supplementary material
Source: PubMed Central journal article supplement (PMC3173173)
Supplement: supp_M111.258970_jbc.M111.258970-1.pdf [file supp_M111.258970_jbc.M111.258970-1.pdf]

## Supplementary Figure legends

**Figure S1** Temporal expression profiles of *Atf/Creb* mRNA in the livers of wild-type mice. All values are normalized to the expression of internal control gene (*Actin*) and are shown as means  $\pm$  s.e.m. of 4 mice. Significant time-dependent variation in mRNA levels of *Atf5* ( $P < 0.05$ , ANOVA).

**Figure S2** Temporal expression profiles of *Atf4* mRNA in the suprachiasmatic nuclei, cerebral cortex, kidney, and small intestine of wild-type and *Clock/Clock* mice. Values are normalized to the expression of internal control gene (*Actin*) and are shown as means  $\pm$  s.e.m. of four to six mice. Significant time-dependent variation in mRNA levels of *Atf4* in all tissues from wild-type mice (all  $P < 0.05$ , ANOVA).

**Figure S3** Temporal changes in PER2 and CRY1 binding to *Atf4* promoter in the livers of wild-type mice. Primer sequences for amplification of the surrounding E-box in the mouse *Atf4* promoter (from bp -194 to +12) are as follows, 5'-TCTAACGCCACAGTTACC-3' and 5'-ACTTA-AACCGGCAGACAG-3'. The positive control comprising the putative CLOCK/BMAL1 target region in the *Cry1* promoter was amplified using the primer pair, 5'-GCACGCGGGGGTC-TGAGCCA-3' and 5'-CCGGTCCCGAGGCTGCCCG-3'. Values were normalized to input control. Values are means  $\pm$  s.e.m. for 4 mice. \* $P < 0.05$  compared between groups.

**Figure S4** Temporal expression profiles of *Dbp* and *Tef* mRNA in MEFs prepared from wild-type and *Atf4*  $-/-$  mice. Mean basal value (0 h) of wild-type cells was set at 1.0. Values are shown as means  $\pm$  s.e.m. of four observations. Significant time-dependent variation in mRNA levels of *Dbp* and *Tef* in wild-type MEFs (both  $P < 0.05$ ; ANOVA).

**Figure S5** Comparison of cAMP contents in cultured MEFs (left panel), or several organs (liver, kidney, small intestine and cerebral cortex) of mice (right panel). All values are shown as means  $\pm$  s.e.m. of four observations. Intracellular cAMP contents were assessed using an ELISA kit (Cell Biolabs Inc., San Diego, CA, USA) according to manufacture's instruction.

**Figure S6** Influence of fibroblast growth factor-2 (FGF-2) on the expression of *Atf4* mRNA in MEFs prepared from wild-type and *Clock/Clock* mice. Cells were incubated with 25 ng/mL FGF-2 for 4 h. Levels of *Atf4* mRNA were assessed at indicated times by RT-PCR. All values are shown as means  $\pm$  s.e.m. of three observations. \* $P < 0.05$  compared with basal levels (0 h) of each genotype.

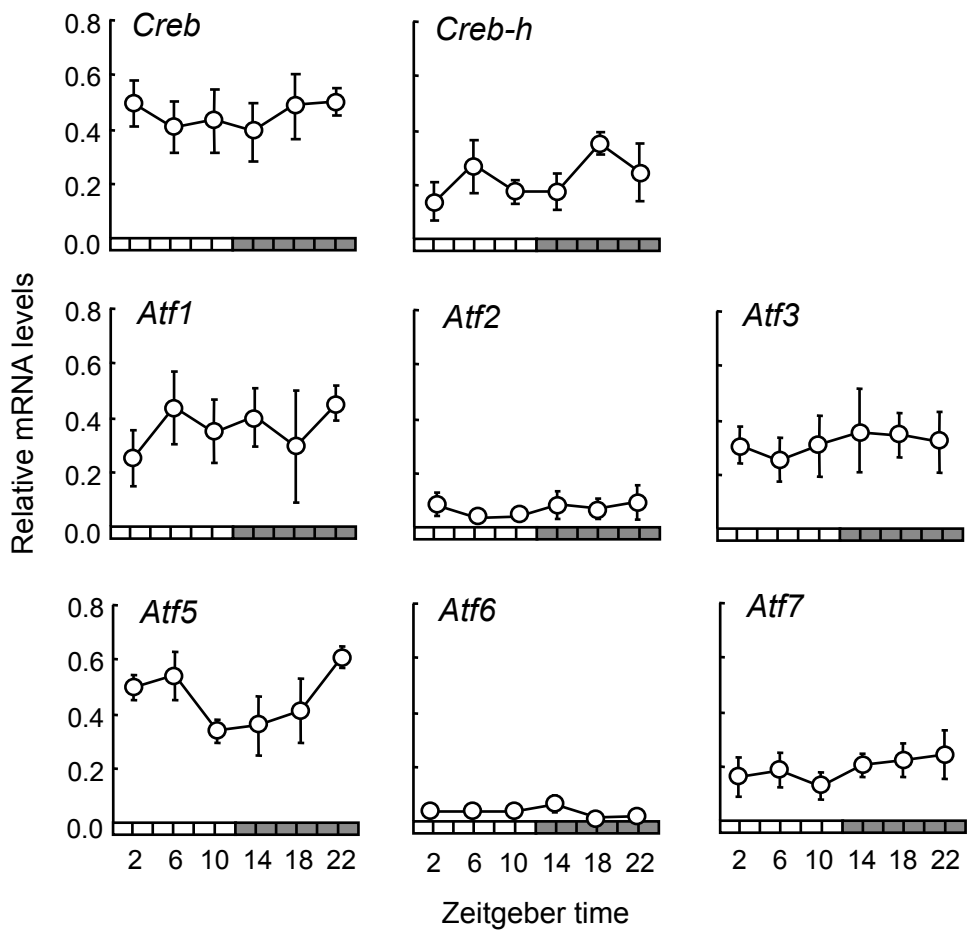

Fig.S1

○ : Wild-type mice      ● : *Clock/Clock* mice

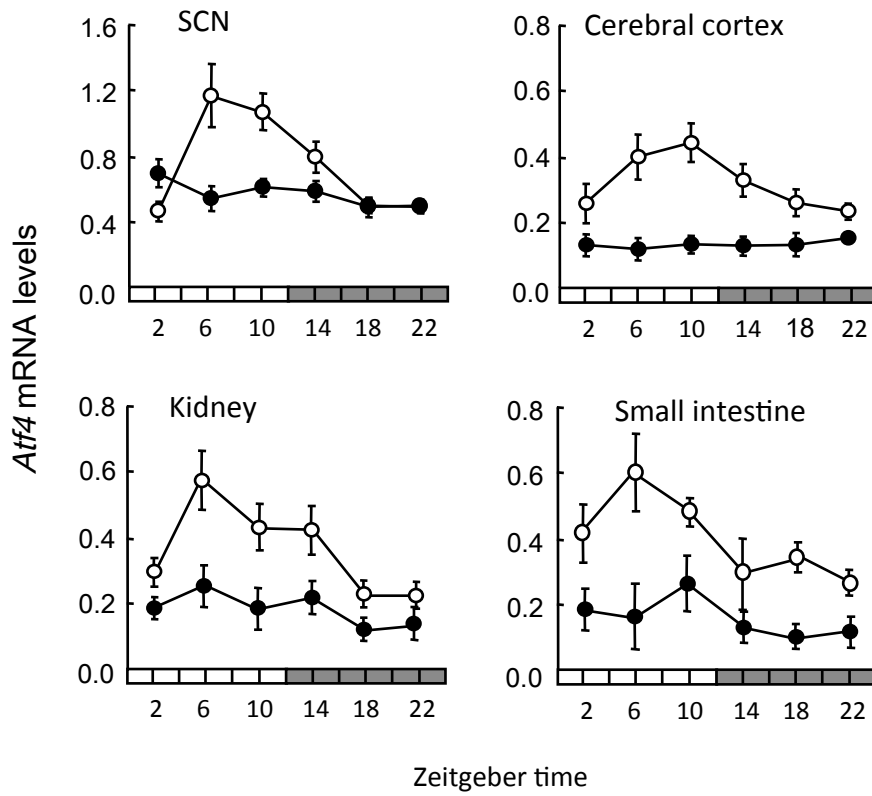

Fig.S2

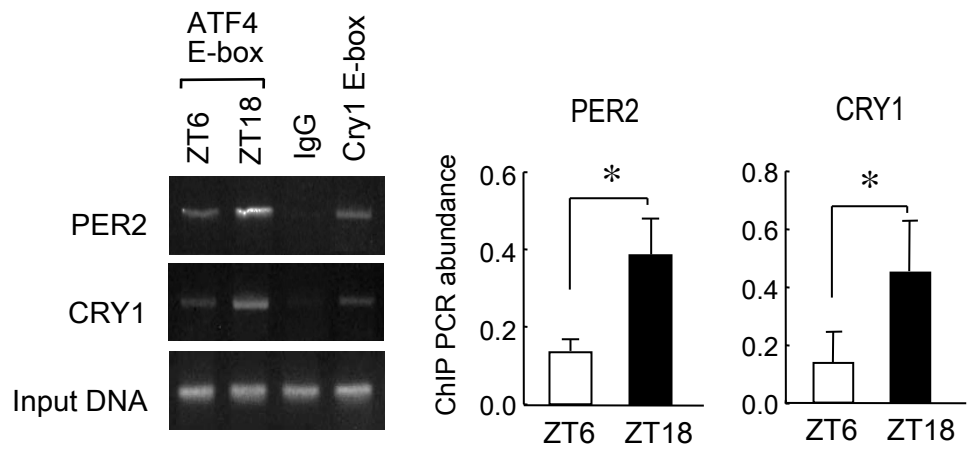

Fig.S3

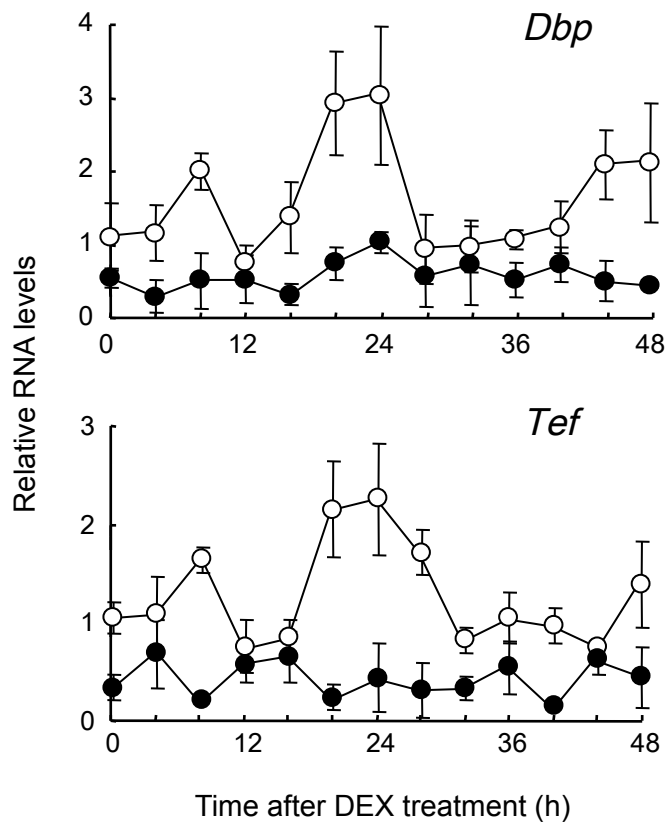

Fig.S4

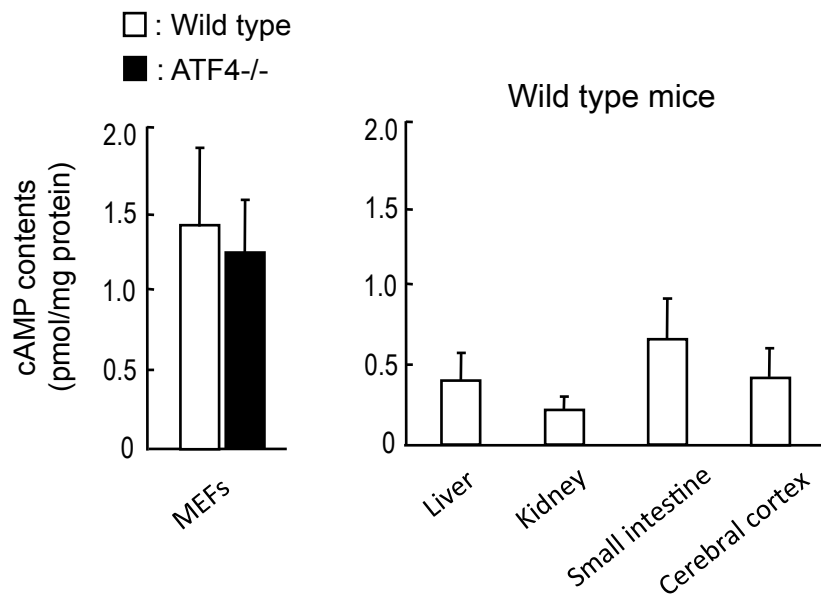

Fig.S5

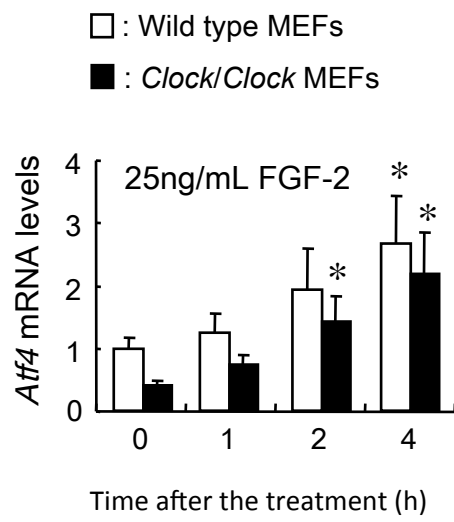

Fig.S6
