# Supplementary material
Source: PubMed Central journal article supplement (PMC3173173)
Supplement: supp_M111.258970_jbc.M111.258970-2.pdf [file supp_M111.258970_jbc.M111.258970-2.pdf]

Table S1. Primer sets for RT-PCR analysis

| Gene            |         | Primers                         |
|-----------------|---------|---------------------------------|
| <i>Creb</i>     | forward | 5'-ATGCCAGCAGCTCATGCAACAT-3'    |
|                 | reverse | 5'-ACTGTTTGGACTTGTGGAGACTGGA-3' |
| <i>Creb-H</i>   | forward | 5'-AGCGGCTGGAAAGATGGCGT-3'      |
|                 | reverse | 5'-TCGGCCAGCTCCACGTTTCT-3'      |
| <i>Atf1</i>     | forward | 5'- GGACTCATCTGACAGCATAG-3'     |
|                 | reverse | 5'- CTGCTTGAATTTGTCATGGT-3'     |
| <i>Atf2</i>     | forward | 5'- ATTCAACAAGCAGTACCTTC-3'     |
|                 | reverse | 5'- GTATCACCATTGGTAACTGG-3'     |
| <i>Atf3</i>     | forward | 5'- GATGTCAGTCACCAAGTC-3'       |
|                 | reverse | 5'- GGAGGATTCAGTAAGAACTC-3'     |
| <i>Atf4</i>     | forward | 5'- CGAATGGATGACCTGGAAAC-3'     |
|                 | reverse | 5'- GGCTGCAAGAATGTAAAGGG-3'     |
| <i>Atf5</i>     | forward | 5'- GGCTTCTCTGATTGGATGAC-3'     |
|                 | reverse | 5'- GAGCAGCTGACTTATTCTGG-3'     |
| <i>Atf6</i>     | forward | 5'- TCTTCAACTCAGCACGTTC-3'      |
|                 | reverse | 5'- GTATGCTGATAATCGACTGCT-3'    |
| <i>Atf7</i>     | forward | 5'- CATAAGCATGAGATGACACT-3'     |
|                 | reverse | 5'- CATTAGCAAGATGCATGAC-3'      |
| <i>Per1</i>     | forward | 5'- TCTGGTTCGGGATCCACGAA-3'     |
|                 | reverse | 5'- GAAGAGTCGATGCTGCCAAAG-3'    |
| <i>Per2</i>     | forward | 5'- CACCCTGAAAAGAAAGTGCGA-3'    |
|                 | reverse | 5'- CAACGCCAAGGAGCTCAAGT-3'     |
| <i>Bmal1</i>    | forward | 5'- CCGATGACGAACTGAAACACCT-3'   |
|                 | reverse | 5'- TGCAGTGTCCGAGGAAGATAGC-3'   |
| <i>Rev-erba</i> | forward | 5'-AGGCTTCCGTGACCTTTCTCA-3'     |
|                 | reverse | 5'- GTCTGGTCCTTCACGTTGAACA-3'   |
| <i>B-Actin</i>  | forward | 5'- CACACCTTCTACAATGAGCTGC-3'   |
|                 | reverse | 5'- CATGATCTGGGTCATCTTTTCA-3'   |
