# Supplementary material
Source: PubMed Central journal article supplement (PMC3173173)
Supplement: supp_M111.258970_jbc.M111.258970-3.pdf [file supp_M111.258970_jbc.M111.258970-3.pdf]

Table S2. Primer sets for ChIP analysis

| Gene              | Primers |                                  |
|-------------------|---------|----------------------------------|
| <i>Per1</i> CRE   | forward | 5'- AACACGATGTTCCCTAGTGC-3'      |
|                   | reverse | 5'- ATCAGTCCCCCACAGTAACC-3'      |
| <i>Per2</i> CRE   | forward | 5'- GAGACTCTGCCAGGTGGATG-3'      |
|                   | reverse | 5'- CACCCTGCACACACCCAAAG-3'      |
| <i>Cry2</i> CRE   | forward | 5'- TGTA ACTCCAACCCCCAGAAA-3'    |
|                   | reverse | 5'- AGTCTCTGCCCCGACTCTCTC-3'     |
| <i>Bmal1</i> CRE  | forward | 5'- TCAAATCCCAGCAACCACATG-3'     |
|                   | reverse | 5'- TTTTACTTGTACCCTGATGCTTAAT-3' |
| <i>Per2</i> E-box | forward | 5'- GGTTCCGCCCCGCCAGTATGC-3'     |
|                   | reverse | 5'- CCGTCACTTGGTGCGCTCGGC-3'     |
