# Supplementary material
Source: PubMed Central journal article supplement (PMC3173173)
Supplement: supp_M111.258970_jbc.M111.258970-4.pdf [file supp_M111.258970_jbc.M111.258970-4.pdf]

**Table S3 Differentially expressed genes between wild-type and *Atf4*<sup>-/-</sup> MEFs**

| GeneSymbol       | Accession NO. | Description                                                                                                  | Fold change ( <i>Atf4</i> <sup>-/-</sup> /WT) | Zscore  |
|------------------|---------------|--------------------------------------------------------------------------------------------------------------|-----------------------------------------------|---------|
| <i>Hoxb13</i>    | NM_008267     | Homeobox B13                                                                                                 | 108.1163                                      | 11.0298 |
| <i>Lactb</i>     | NM_030717     | Lactamase beta, nuclear gene encoding mitochondrial protein                                                  | 33.7809                                       | 10.7847 |
| <i>Serpina3h</i> | NM_001034870  | Serine (or cysteine) peptidase inhibitor, clade A, member 3H                                                 | 32.9172                                       | 10.7054 |
| <i>Ly6c1</i>     | NM_010741     | Lymphocyte antigen 6 complex, locus C1                                                                       | 4.6897                                        | 10.4307 |
| <i>Ovol3</i>     | XM_355880     | OVO homolog-like 3                                                                                           | 55.0425                                       | 9.4405  |
| <i>Ptprh</i>     | NM_207270     | Tyrosine phosphatase, receptor type, H                                                                       | 241.5026                                      | 8.4349  |
| <i>Cpsf3l</i>    | NM_028020     | Cleavage and polyadenylation specific factor 3-like                                                          | 240.9038                                      | 8.4311  |
| <i>Coch</i>      | NM_007728     | Coagulation factor C homolog (Limulus polyphemus)                                                            | 13.3684                                       | 7.9459  |
| <i>Cck</i>       | NM_031161     | Cholecystokinin                                                                                              | 4.6746                                        | 7.7590  |
| <i>Kif5b</i>     | NM_008448     | Kinesin family member 5B                                                                                     | 12.3615                                       | 7.7061  |
| <i>Wfdc2</i>     | NM_026323     | WAP four-disulfide core domain 2                                                                             | 20.7037                                       | 7.1387  |
| <i>Iqcf5</i>     | NM_029300     | IQ motif containing F5                                                                                       | 102.9409                                      | 7.1231  |
| <i>Lce1g</i>     | NM_025413     | Late cornified envelope 1G                                                                                   | 10.2039                                       | 7.1187  |
| <i>Smok2b</i>    | NM_001167913  | Sperm motility kinase 2B                                                                                     | 98.4481                                       | 7.0545  |
| <i>Fam132a</i>   | NM_026125     | Family with sequence similarity 132, member A                                                                | 6.1043                                        | 6.8677  |
| <i>Wfdc2</i>     | NM_026323     | WAP four-disulfide core domain 2                                                                             | 18.0970                                       | 6.8219  |
| <i>Acpl2</i>     | NM_153420     | Acid phosphatase-like 2                                                                                      | 5.7513                                        | 6.6417  |
| <i>Trim31</i>    | NM_146077     | Tripartite motif-containing 31                                                                               | 73.7754                                       | 6.6106  |
| <i>Hs3st2</i>    | NM_001081327  | Heparan sulfate 3-O-sulfotransferase 2                                                                       | 73.4230                                       | 6.6033  |
| <i>Slc34a1</i>   | NM_011392     | Solute carrier family 34 (sodium phosphate), member 1                                                        | 72.5513                                       | 6.5849  |
| <i>Prr9</i>      | NM_175424     | Proline rich 9                                                                                               | 5.4667                                        | 6.4492  |
| <i>Crb1</i>      | NM_133239     | Crumbs homolog 1                                                                                             | 59.6723                                       | 6.2842  |
| <i>Lce1i</i>     | NM_029667     | Late cornified envelope 1I                                                                                   | 5.1917                                        | 6.2533  |
| <i>Wnt8b</i>     | NM_011720     | Wingless related MMTV integration site 8b                                                                    | 56.9637                                       | 6.2128  |
| <i>Hist1h4k</i>  | NM_178211     | Histone cluster 1, H4k                                                                                       | 2.5001                                        | 6.1820  |
| <i>Hist2h4</i>   | NM_033596     | Histone cluster 2, H4                                                                                        | 2.4874                                        | 6.1477  |
| <i>Serpina3f</i> | NM_001168294  | Serine (or cysteine) peptidase inhibitor, clade A, member 3F transcript variant 1                            | 12.6776                                       | 5.9841  |
| <i>Mmp3</i>      | NM_010809     | Matrix metalloproteinase 3                                                                                   | 4.7335                                        | 5.9027  |
| <i>Ncam2</i>     | NM_010954     | Neural cell adhesion molecule 2, transcript variant 2                                                        | 45.7003                                       | 5.8739  |
| <i>Tmem229a</i>  | NM_177013     | Transmembrane protein 229A                                                                                   | 42.2065                                       | 5.7515  |
| <i>Arhgap8</i>   | NM_028455     | Rho GTPase activating protein 8, transcript variant 3                                                        | 6.5157                                        | 5.7451  |
| <i>Cotl1</i>     | NM_028071     | Coactosin-like 1                                                                                             | 3.0957                                        | 5.6845  |
| <i>Gltpd1</i>    | NM_024472     | Glycolipid transfer protein domain containing 1                                                              | 39.0322                                       | 5.6312  |
| <i>Perp</i>      | NM_022032     | PERP, TP53 apoptosis effector                                                                                | 3.0483                                        | 5.6067  |
| <i>Actc1</i>     | NM_009608     | Actin, alpha, cardiac muscle 1                                                                               | 10.5328                                       | 5.5477  |
| <i>Gm8740</i>    | AY056585      | T-cell receptor alpha V gene segment [ENSMUST00000103649]                                                    | 36.0237                                       | 5.5078  |
| <i>Snhg3</i>     | NR_003270     | Small nucleolar RNA host gene (non-protein coding) 3                                                         | 4.2553                                        | 5.4986  |
| <i>Ptpn5</i>     | NM_013643     | Protein tyrosine phosphatase, non-receptor type 5, transcript variant 1                                      | 34.3850                                       | 5.4362  |
| <i>Cyp26b1</i>   | NM_175475     | Cytochrome P450, family 26, subfamily b, polypeptide 1                                                       | 4.0849                                        | 5.3435  |
| <i>Hoxc13</i>    | NM_010464     | Homeobox C13                                                                                                 | 9.6293                                        | 5.3366  |
| <i>Lce1i</i>     | NM_029667     | Late cornified envelope 1I                                                                                   | 5.6534                                        | 5.3104  |
| <i>Lefty1</i>    | NM_010094     | Left right determination factor 1                                                                            | 31.1973                                       | 5.2865  |
| <i>Dmd</i>       | NM_007868     | Dystrophin, muscular dystrophy                                                                               | 9.3534                                        | 5.2682  |
| <i>Pf4</i>       | NM_019932     | Platelet factor 4                                                                                            | 5.5738                                        | 5.2670  |
| <i>Lyz1</i>      | NM_013590     | Lysozyme 1                                                                                                   | 3.9842                                        | 5.2488  |
| <i>Clu</i>       | NM_013492     | Clusterin                                                                                                    | 3.9630                                        | 5.2285  |
| <i>Prg4</i>      | NM_021400     | Proteoglycan 4, transcript variant 1                                                                         | 5.4776                                        | 5.2137  |
| <i>Tyrobp</i>    | NM_011662     | TYRO protein tyrosine kinase binding protein                                                                 | 5.3711                                        | 5.1535  |
| <i>Adam8</i>     | NM_007403     | A disintegrin and metalloproteinase domain 8                                                                 | 3.8611                                        | 5.1298  |
| <i>Bcl2a1d</i>   | NM_007536     | B-cell leukemia/lymphoma 2 related protein A1d                                                               | 8.6249                                        | 5.0773  |
| <i>Vgf</i>       | NM_001039385  | VEGF nerve growth factor inducible                                                                           | 5.2268                                        | 5.0702  |
| <i>Gm10639</i>   | NM_001122660  | Predicted gene 10639                                                                                         | 5.0670                                        | 4.9750  |
| <i>Mgat4c</i>    | NM_001162368  | Mannosyl (alpha-1,3-)-glycoprotein beta-1,4-N-acetylglucosaminyltransferase, isozyme C, transcript variant 1 | 25.4124                                       | 4.9710  |
| <i>Gsta2</i>     | NM_008182     | Glutathione S-transferase, alpha 2                                                                           | 5.0283                                        | 4.9516  |
| <i>Cyp4a32</i>   | NM_001100181  | Cytochrome P450, family 4, subfamily a, polypeptide 32                                                       | 24.9406                                       | 4.9422  |
| <i>Dsp</i>       | NM_023842     | Desmoplakin                                                                                                  | 8.1427                                        | 4.9419  |
| <i>Cryab</i>     | NM_009964     | Crystallin, alpha B                                                                                          | 2.6512                                        | 4.9042  |
| <i>Rem1</i>      | NM_009047     | Rad and gem related GTP binding protein 1                                                                    | 4.9451                                        | 4.9005  |
| <i>Hist1h4d</i>  | NM_175654     | Histone cluster 1, H4d                                                                                       | 2.6464                                        | 4.8951  |
| <i>Erdr1</i>     | NM_133362     | Erythroid differentiation regulator 1                                                                        | 2.0595                                        | 4.8724  |
| <i>Dio1</i>      | NM_007860     | Deiodinase, iodothyronine, type I                                                                            | 23.6665                                       | 4.8615  |
| <i>Slc15a3</i>   | NM_023044     | Solute carrier family 15, member 3                                                                           | 23.4095                                       | 4.8447  |
| <i>Gsta1</i>     | NM_008181     | Glutathione S-transferase, alpha 1                                                                           | 4.7632                                        | 4.7857  |
| <i>Lce1h</i>     | NM_026335     | Late cornified envelope 1H                                                                                   | 4.7524                                        | 4.7788  |

| GeneSymbol       | Accession NO. | Description                                                                   | Fold change (At44 <sup>+/</sup> /WT) | Zscore |
|------------------|---------------|-------------------------------------------------------------------------------|--------------------------------------|--------|
| <i>Lars2</i>     | NM_153168     | Leucyl-tRNA synthetase                                                        | 4.6760                               | 4.7291 |
| <i>Slc26a4</i>   | NM_011867     | Solute carrier family 26, member 4                                            | 21.6589                              | 4.7252 |
| <i>Ahcy</i>      | BC086781      | S-adenosylhomocysteine hydrolase                                              | 4.6505                               | 4.7124 |
| <i>Hspe1</i>     | NM_008303     | Heat shock protein 1                                                          | 2.0002                               | 4.6753 |
| <i>Kctd12b</i>   | NM_175429     | Potassium channel tetramerisation domain containing 12b                       | 4.5494                               | 4.6451 |
| <i>Lce1e</i>     | NM_026811     | Late cornified envelope 1E                                                    | 4.5131                               | 4.6206 |
| <i>ApoE</i>      | NM_009696     | Apolipoprotein E                                                              | 3.3503                               | 4.5912 |
| <i>Exosc9</i>    | NM_019393     | Exosome component 9                                                           | 2.4446                               | 4.4959 |
| <i>Etnk2</i>     | NM_175443     | Ethanolamine kinase 2                                                         | 6.7229                               | 4.4908 |
| <i>Blnk</i>      | NM_008528     | B-cell linker                                                                 | 6.7143                               | 4.4878 |
| <i>Ybx1</i>      | M60419        | Y-box binding protein 1                                                       | 2.4300                               | 4.4658 |
| <i>Rgs8</i>      | NM_026380     | Regulator of G-protein signaling 8                                            | 18.2385                              | 4.4607 |
| <i>Serpina3b</i> | NM_173024     | Serine (or cysteine) peptidase inhibitor, clade A, member 3B                  | 4.2688                               | 4.4501 |
| <i>Abcb4</i>     | NM_008830     | ATP-binding cassette, sub-family B, member 4                                  | 3.1961                               | 4.4125 |
| <i>Ptpn22</i>    | NM_021464     | Protein tyrosine phosphatase, receptor type, T                                | 17.3145                              | 4.3808 |
| <i>Lilrb3</i>    | NM_011095     | Leukocyte immunoglobulin-like receptor, subfamily B, member 3                 | 6.2406                               | 4.3155 |
| <i>Tro</i>       | NM_001002272  | Trophinin (Tro), transcript variant 1                                         | 3.1077                               | 4.3061 |
| <i>Eif2s1</i>    | NM_026114     | Eukaryotic translation initiation factor 2, subunit 1 alpha                   | 4.0702                               | 4.3042 |
| <i>Sh3bgrl2</i>  | NM_172507     | SH3 domain binding glutamic acid-rich protein like 2                          | 4.0243                               | 4.2695 |
| <i>Dclre1c</i>   | NM_175683     | DNA cross-link repair 1C, PSO2 homolog (S. cerevisiae), transcript variant 2  | 16.0588                              | 4.2649 |
| <i>Angptl7</i>   | NM_001039554  | Angiopoietin-like 7                                                           | 6.0730                               | 4.2514 |
| <i>Lmo1</i>      | NM_057173     | LIM domain only 1                                                             | 2.9594                               | 4.1205 |
| <i>Prl2c5</i>    | NM_181852     | Prolactin family 2, subfamily c, member 5                                     | 3.6963                               | 4.0092 |
| <i>Sgca</i>      | NM_009161     | Sarcoglycan, alpha (dystrophin-associated glycoprotein), transcript variant 2 | 13.5947                              | 4.0087 |
| <i>Sema3f</i>    | NM_011349     | Sema domain, immunoglobulin domain, short basic domain, secreted 3F           | 2.8724                               | 4.0073 |
| <i>Mlh1</i>      | NM_026810     | MutL homolog 1 (E. coli)                                                      | 3.6847                               | 3.9995 |
| <i>Ms4a7</i>     | NM_001025610  | Membrane-spanning 4-domains, subfamily A, member 7, transcript variant 2      | 5.4171                               | 3.9824 |
| <i>Prl2c5</i>    | NM_181852     | Prolactin family 2, subfamily c, member 5                                     | 3.6458                               | 3.9670 |
| <i>Slc6a12</i>   | NM_133661     | Solute carrier family 6, member 12                                            | 5.3389                               | 3.9482 |
| <i>Tuft1</i>     | NM_011656     | Tuftelin 1                                                                    | 2.8117                               | 3.9263 |
| <i>AcsM1</i>     | NM_054094     | Acyl-CoA synthetase medium-chain family member 1                              | 12.7180                              | 3.9061 |
| <i>KazalD1</i>   | NM_178929     | Kazal-type serine peptidase inhibitor domain 1                                | 2.7891                               | 3.8956 |
| <i>Sash3</i>     | NM_028773     | SAM and SH3 domain containing 3                                               | 12.6049                              | 3.8924 |
| <i>Rab3b</i>     | NM_023537     | RAB3B, member RAS oncogene family                                             | 3.5435                               | 3.8799 |
| <i>Csf2rb</i>    | NM_007780     | Colony stimulating factor 2 receptor, beta, low-affinity                      | 5.1721                               | 3.8734 |
| <i>FcεR1g</i>    | NM_010185     | Fc receptor, IgE, high affinity I, gamma polypeptide                          | 3.5223                               | 3.8615 |
| <i>Dhrs3</i>     | NM_011303     | Dehydrogenase/reductase (SDR family) member 3                                 | 2.7599                               | 3.8557 |
| <i>Cyp2j11</i>   | NM_001004141  | Cytochrome P450, family 2, subfamily j, polypeptide 11                        | 12.3027                              | 3.8550 |
| <i>Thsd7a</i>    | NM_001164805  | Thrombospondin, type I, domain containing 7A                                  | 3.5052                               | 3.8466 |
| <i>Nt5e</i>      | NM_011851     | 5' nucleotidase, ecto                                                         | 5.0921                               | 3.8368 |
| <i>Scn10a</i>    | NM_009134     | Sodium channel, voltage-gated, type X, alpha                                  | 12.0724                              | 3.8260 |
| <i>Pigt</i>      | NM_133779     | Phosphatidylinositol glycan anchor biosynthesis, class T (Pigt)               | 2.7237                               | 3.8056 |
| <i>Tuft1</i>     | NM_011656     | Tuftelin 1 (Tuft1)                                                            | 2.7178                               | 3.7974 |
| <i>Myh3</i>      | NM_001099635  | Myosin, heavy polypeptide 3                                                   | 11.7163                              | 3.7799 |
| <i>Bmp8b</i>     | NM_007559     | Bone morphogenetic protein 8b                                                 | 4.9690                               | 3.7792 |
| <i>Fam46b</i>    | NM_175307     | Family with sequence similarity 46, member B                                  | 2.6974                               | 3.7689 |
| <i>Mpzl2</i>     | NM_007962     | Myelin protein zero-like 2                                                    | 3.4154                               | 3.7672 |
| <i>Lce1c</i>     | NM_028622     | Late cornified envelope 1C                                                    | 4.9403                               | 3.7655 |
| <i>Gpnmb</i>     | NM_053110     | Glycoprotein (transmembrane) nmb                                              | 2.6872                               | 3.7544 |
| <i>Hist1h4k</i>  | NM_178211     | Histone cluster 1, H4k                                                        | 2.6858                               | 3.7525 |
| <i>Rpl21</i>     | NM_019647     | Ribosomal protein L21                                                         | 3.3861                               | 3.7407 |
| <i>Ccl6</i>      | NM_009139     | Chemokine (C-C motif) ligand 6                                                | 4.8771                               | 3.7352 |
| <i>Selp</i>      | NM_011347     | Selectin, platelet                                                            | 3.3627                               | 3.7195 |
| <i>Pla2g2d</i>   | NM_011109     | Phospholipase A2, group IID                                                   | 11.1317                              | 3.7012 |
| <i>Upk1b</i>     | NM_178924     | Uroplakin 1B                                                                  | 4.7932                               | 3.6943 |
| <i>Mpeg1</i>     | NM_010821     | Macrophage expressed gene 1                                                   | 4.7803                               | 3.6880 |
| <i>Aldh1a1</i>   | NM_013467     | Aldehyde dehydrogenase family 1, subfamily A1                                 | 4.7718                               | 3.6838 |
| <i>Pdhb</i>      | NM_024221     | Pyruvate dehydrogenase (lipoamide) beta                                       | 2.0731                               | 3.6661 |
| <i>Ugt1a6a</i>   | NM_145079     | UDP glucuronosyltransferase 1 family, polypeptide A6A                         | 3.3037                               | 3.6653 |
| <i>Gcnt1</i>     | NM_173442     | Glucosaminyl (N-acetyl) transferase 1, core 2, transcript variant 1           | 4.7326                               | 3.6644 |
| <i>Trim61</i>    | NM_153110     | Tripartite motif-containing 61                                                | 10.7953                              | 3.6540 |
| <i>Miox</i>      | NM_019977     | Myo-inositol oxygenase                                                        | 4.7104                               | 3.6533 |
| <i>Zfp536</i>    | NM_172385     | Zinc finger protein 536                                                       | 4.6777                               | 3.6369 |
| <i>Thsd7a</i>    | NM_001164805  | Thrombospondin, type I, domain containing 7A                                  | 3.2721                               | 3.6359 |
| <i>Clec4d</i>    | NM_010819     | C-type lectin domain family 4, member d                                       | 4.6727                               | 3.6344 |
| <i>Arsk</i>      | NM_029847     | Arylsulfatase K                                                               | 10.6395                              | 3.6316 |

| GeneSymbol       | Accession NO. | Description                                                                         | Fold change (Atf4 <sup>-/-</sup> /WT) | Zscore |
|------------------|---------------|-------------------------------------------------------------------------------------|---------------------------------------|--------|
| <i>Glrx2</i>     | NM_001038592  | Glutaredoxin 2 (thioltransferase), transcript variant 1                             | 2.5871                                | 3.6104 |
| <i>Krt8</i>      | NM_031170     | Keratin 8                                                                           | 10.3629                               | 3.5911 |
| <i>Olfrl1414</i> | NM_147039     | Olfactory receptor 1414                                                             | 10.2423                               | 3.5731 |
| <i>Olfrl456</i>  | NM_001011528  | Olfactory receptor 456                                                              | 9.9113                                | 3.5225 |
| <i>Pcp4l1</i>    | NM_025557     | Purkinje cell protein 4-like 1                                                      | 2.5204                                | 3.5114 |
| <i>Rprd1b</i>    | NM_027434     | Regulation of nuclear pre-mRNA domain containing 1B                                 | 3.1310                                | 3.5009 |
| <i>Amhr2</i>     | NM_144547     | Anti-Mullerian hormone type 2 receptor                                              | 4.3946                                | 3.4899 |
| <i>Casp4</i>     | NM_007609     | Caspase 4, apoptosis-related cysteine peptidase                                     | 4.3882                                | 3.4865 |
| <i>Npy</i>       | NM_023456     | Neuropeptide Y                                                                      | 9.6545                                | 3.4822 |
| <i>Ly6f</i>      | NM_008530     | Lymphocyte antigen 6 complex, locus F                                               | 4.3713                                | 3.4774 |
| <i>Rgs4</i>      | NM_009062     | Regulator of G-protein signaling 4                                                  | 2.4960                                | 3.4744 |
| <i>Hist4h4</i>   | NM_175652     | Histone cluster 4, H4                                                               | 2.4958                                | 3.4741 |
| <i>Cd5</i>       | NM_007650     | CD5 antigen                                                                         | 4.3628                                | 3.4729 |
| <i>Pitpnm3</i>   | NM_001024927  | PITPNM family member 3, transcript variant 1                                        | 9.5844                                | 3.4709 |
| <i>AF251705</i>  | NM_134158     | cDNA sequence AF251705                                                              | 9.5816                                | 3.4705 |
| <i>Pnma2</i>     | NM_175498     | Paraneoplastic antigen MA2                                                          | 9.4495                                | 3.4491 |
| <i>Lsr</i>       | NM_017405     | Lipolysis stimulated lipoprotein receptor, transcript variant 1                     | 4.3018                                | 3.4397 |
| <i>Pdpr</i>      | NM_010329     | Podoplanin                                                                          | 2.4697                                | 3.4343 |
| <i>Apln</i>      | NM_013912     | Apelin                                                                              | 3.0623                                | 3.4329 |
| <i>Dhh</i>       | NM_007857     | Desert hedgehog                                                                     | 4.2877                                | 3.4320 |
| <i>Trem2</i>     | NM_031254     | Triggering receptor expressed on myeloid cells 2                                    | 4.2788                                | 3.4271 |
| <i>Gprasp2</i>   | NM_001163015  | G protein-coupled receptor associated sorting protein 2, transcript variant 1       | 4.2705                                | 3.4225 |
| <i>Abcb1b</i>    | NM_011075     | ATP-binding cassette, sub-family B (MDR/TAP), member 1B                             | 2.4548                                | 3.4112 |
| <i>Krt18</i>     | NM_010664     | Keratin 18                                                                          | 2.4457                                | 3.3971 |
| <i>Acpl2</i>     | NM_153420     | Acid phosphatase-like 2                                                             | 9.1249                                | 3.3954 |
| <i>Rtn1</i>      | NM_153457     | Reticulon 1, transcript variant 1                                                   | 4.1992                                | 3.3829 |
| <i>Tpm1</i>      | NM_001164248  | Tropomyosin 1, alpha, transcript variant 1                                          | 2.4346                                | 3.3799 |
| <i>Kap</i>       | NM_010594     | Kidney androgen regulated protein                                                   | 8.9373                                | 3.3634 |
| <i>Lilrb4</i>    | NM_013532     | Leukocyte immunoglobulin-like receptor, subfamily B, member 4                       | 4.1597                                | 3.3607 |
| <i>Cda</i>       | NM_028176     | Cytidine deaminase                                                                  | 4.1468                                | 3.3533 |
| <i>Lynx1</i>     | NM_011838     | Ly6/neurotoxin 1                                                                    | 2.4120                                | 3.3445 |
| <i>Cryab</i>     | NM_009964     | Crystallin, alpha B                                                                 | 2.4118                                | 3.3442 |
| <i>Ctnna2</i>    | NM_001109764  | Catenin (cadherin associated protein), alpha 2, transcript variant 3                | 8.7997                                | 3.3395 |
| <i>Rnf39</i>     | NM_001099632  | Ring finger protein 39                                                              | 4.0956                                | 3.3241 |
| <i>Tpm1</i>      | NM_001164248  | Tropomyosin 1, alpha, transcript variant 1                                          | 2.3845                                | 3.3010 |
| <i>Chi3l1</i>    | NM_007695     | Chitinase 3-like 1                                                                  | 8.5637                                | 3.2977 |
| <i>Nppa</i>      | NM_008725     | Natriuretic peptide precursor type A                                                | 3.9923                                | 3.2639 |
| <i>Vax1</i>      | NM_009501     | Ventral anterior homeobox containing gene 1                                         | 8.3354                                | 3.2561 |
| <i>Bcmo1</i>     | NM_021486     | Beta-carotene 15,15'-monooxygenase, transcript variant 1                            | 31.0785                               | 3.2456 |
| <i>Lce1f</i>     | NM_026394     | Late cornified envelope 1F                                                          | 3.9465                                | 3.2368 |
| <i>Casp4</i>     | NM_007609     | Caspase 4, apoptosis-related cysteine peptidase                                     | 3.9411                                | 3.2336 |
| <i>Ephx2</i>     | NM_007940     | Epoxide hydrolase 2, cytoplasmic                                                    | 2.8618                                | 3.2256 |
| <i>Meox1</i>     | NM_010791     | Mesenchyme homeobox 1                                                               | 8.1542                                | 3.2223 |
| <i>Ctss</i>      | NM_021281     | Cathepsin S                                                                         | 3.9069                                | 3.2130 |
| <i>Prdm13</i>    | NM_001080771  | PR domain containing 13                                                             | 8.0359                                | 3.1998 |
| <i>Itga1</i>     | NM_001033228  | Integrin alpha 1                                                                    | 3.8715                                | 3.1916 |
| <i>Wnt5b</i>     | NM_009525     | Wingless-related MMTV integration site 5B                                           | 2.8302                                | 3.1916 |
| <i>Ces1</i>      | NM_021456     | Carboxylesterase 1                                                                  | 7.9485                                | 3.1830 |
| <i>Bex2</i>      | NM_009749     | Brain expressed X-linked 2                                                          | 3.8082                                | 3.1528 |
| <i>Fzd2</i>      | NM_020510     | Frizzled homolog 2 (Drosophila)                                                     | 3.7894                                | 3.1411 |
| <i>Hoxc11</i>    | NM_001024842  | Homeobox C11                                                                        | 3.7775                                | 3.1338 |
| <i>Myh3</i>      | NM_001099635  | Myosin, heavy polypeptide 3, skeletal muscle, embryonic                             | 27.3911                               | 3.1253 |
| <i>Rgs4</i>      | NM_009062     | Regulator of G-protein signaling 4                                                  | 2.2699                                | 3.1141 |
| <i>Rnase9</i>    | NM_183032     | Ribonuclease, RNase A family, 9 (non-active)                                        | 26.9029                               | 3.1082 |
| <i>C1qc</i>      | NM_007574     | Complement component 1, q subcomponent, C chain                                     | 3.7348                                | 3.1070 |
| <i>Emid2</i>     | NM_024474     | EMI domain containing 2                                                             | 7.4985                                | 3.0934 |
| <i>Kifc1</i>     | NM_053173     | Kinesin family member C1                                                            | 2.7406                                | 3.0931 |
| <i>Abcb4</i>     | AK165484      | ATP-binding cassette sub-family B member 4                                          | 26.4713                               | 3.0928 |
| <i>Zfp536</i>    | NM_172385     | Zinc finger protein 536                                                             | 3.7102                                | 3.0914 |
| <i>Wnt16</i>     | NM_053116     | Wingless-related MMTV integration site 16                                           | 3.6988                                | 3.0842 |
| <i>Cyb561</i>    | NM_007805     | Cytochrome b-561                                                                    | 2.7291                                | 3.0802 |
| <i>Sel1l2</i>    | NM_001033296  | Sel-1 suppressor of lin-12-like 2 (C. elegans)                                      | 25.8554                               | 3.0703 |
| <i>Slc11a1</i>   | NM_013612     | Solute carrier family 11 (proton-coupled divalent metal ion transporters), member 1 | 3.6729                                | 3.0677 |
| <i>Gsta4</i>     | NM_010357     | Glutathione S-transferase, alpha 4                                                  | 2.7123                                | 3.0612 |
| <i>Gchfr</i>     | NM_177157     | GTP cyclohydrolase I feedback regulator                                             | 2.2375                                | 3.0596 |
| <i>Pam</i>       | NM_013626     | Peptidylglycine alpha-amidating monooxygenase                                       | 3.6513                                | 3.0538 |

| GeneSymbol       | Accession NO. | Description                                                                                  | Fold change (Atf4 <sup>+/+</sup> /WT) | Zscore |
|------------------|---------------|----------------------------------------------------------------------------------------------|---------------------------------------|--------|
| <i>Mei1</i>      | NM_028897     | Meiosis defective 1                                                                          | 7.2620                                | 3.0441 |
| <i>Kcnj5</i>     | NM_010605     | Potassium inwardly-rectifying channel, subfamily J, member 5                                 | 3.6268                                | 3.0379 |
| <i>Igsf10</i>    | NM_001162884  | Immunoglobulin superfamily, member 10                                                        | 7.2003                                | 3.0309 |
| <i>Igfbp4</i>    | NM_010517     | Insulin-like growth factor binding protein 4                                                 | 2.6810                                | 3.0257 |
| <i>Nrcam</i>     | NM_176930     | Neuron-glia-CAM-related cell adhesion molecule, transcript variant 1                         | 2.6745                                | 3.0183 |
| <i>Oxr1</i>      | NM_130885     | Oxidation resistance 1, transcript variant 1                                                 | 2.2089                                | 3.0107 |
| <i>Ras11a</i>    | NM_026864     | RAS-like, family 11, member A                                                                | 3.5437                                | 2.9833 |
| <i>Lyz2</i>      | NM_017372     | Lysozyme 2                                                                                   | 3.5412                                | 2.9816 |
| <i>Ascl2</i>     | NM_008554     | Achaete-scute complex homolog 2 (Drosophila)                                                 | 3.5396                                | 2.9806 |
| <i>Slc16a11</i>  | NM_153081     | Solute carrier family 16 (monocarboxylic acid transporters), member 11, transcript variant 3 | 2.1909                                | 2.9798 |
| <i>Hist1h4j</i>  | NM_178210     | Histone cluster 1, H4j                                                                       | 2.6293                                | 2.9661 |
| <i>Olfir1287</i> | NM_001011773  | Olfactory receptor 1287                                                                      | 6.8937                                | 2.9640 |
| <i>Ncf4</i>      | NM_008677     | Neutrophil cytosolic factor 4                                                                | 3.5146                                | 2.9639 |
| <i>Pax6</i>      | NM_013627     | Paired box gene 6                                                                            | 22.9434                               | 2.9565 |
| <i>Tmem179</i>   | NM_178915     | Transmembrane protein 179                                                                    | 3.4995                                | 2.9538 |
| <i>Alcam</i>     | NM_009655     | Activated leukocyte cell adhesion molecule                                                   | 2.1746                                | 2.9514 |
| <i>Zfp534</i>    | NM_001127188  | Zinc finger protein 534                                                                      | 6.8321                                | 2.9502 |
| <i>Trmt6</i>     | NM_175113     | tRNA methyltransferase 6 homolog (S. cerevisiae)                                             | 3.4641                                | 2.9299 |
| <i>Luzp2</i>     | NM_178705     | Leucine zipper protein 2                                                                     | 6.6898                                | 2.9178 |
| <i>Slitrk5</i>   | NM_198865     | SLIT and NTRK-like family, member 5                                                          | 3.4249                                | 2.9031 |
| <i>Cyp2j13</i>   | NM_145548     | Cytochrome P450, family 2, subfamily j, polypeptide 13                                       | 3.4246                                | 2.9029 |
| <i>Mdk</i>       | NM_010784     | Midkine, transcript variant 1                                                                | 2.1466                                | 2.9022 |
| <i>Sprr2a2</i>   | NM_001164787  | Small proline-rich protein 2A2                                                               | 6.5991                                | 2.8968 |
| <i>Tbkbp1</i>    | NM_198100     | TBK1 binding protein 1                                                                       | 2.1425                                | 2.8950 |
| <i>Rprm</i>      | NM_023396     | Reprimo, TP53 dependent G2 arrest mediator candidate                                         | 2.5601                                | 2.8844 |
| <i>Angpt2</i>    | NM_007426     | Angiopoietin 2                                                                               | 2.5571                                | 2.8808 |
| <i>Adam26b</i>   | NM_001009547  | A disintegrin and metallopeptidase domain 26B                                                | 3.3854                                | 2.8757 |
| <i>Vsig2</i>     | NM_020518     | V-set and immunoglobulin domain containing 2                                                 | 6.4774                                | 2.8682 |
| <i>Gap43</i>     | NM_008083     | Growth associated protein 43                                                                 | 2.5395                                | 2.8597 |
| <i>Hmha1</i>     | NM_001142701  | Histocompatibility (minor) HA-1, transcript variant 1                                        | 2.5364                                | 2.8559 |
| <i>Lcn4</i>      | NM_010695     | Lipocalin 4                                                                                  | 20.6260                               | 2.8551 |
| <i>Dach1</i>     | NM_007826     | Dachshund 1 (Drosophila), transcript variant 1                                               | 3.3520                                | 2.8524 |
| <i>Stmn2</i>     | NM_025285     | Stathmin-like 2                                                                              | 2.1167                                | 2.8490 |
| <i>Nefm</i>      | NM_008691     | Neurofilament, medium polypeptide                                                            | 6.3539                                | 2.8386 |
| <i>Slc7a8</i>    | NM_016972     | Solute carrier family 7 (cationic amino acid transporter, y+ system), member 8               | 6.3323                                | 2.8333 |
| <i>Myi1</i>      | NM_021285     | Myosin, light polypeptide 1, transcript variant 1f                                           | 6.3229                                | 2.8310 |
| <i>Sh3rf2</i>    | NM_172966     | SH3 domain containing ring finger 2, transcript variant 2                                    | 6.3223                                | 2.8309 |
| <i>Dlx2</i>      | NM_010054     | Distal-less homeobox 2                                                                       | 2.5127                                | 2.8272 |
| <i>Mamdc4</i>    | NM_001081199  | MAM domain containing 4                                                                      | 3.3088                                | 2.8219 |
| <i>Alox5</i>     | NM_009662     | Arachidonate 5-lipoxygenase                                                                  | 6.2777                                | 2.8200 |
| <i>Cd36</i>      | NM_007643     | CD36 antigen, transcript variant 2                                                           | 6.2603                                | 2.8157 |
| <i>Fndc8</i>     | NM_030224     | Fibronectin type III domain containing 8                                                     | 19.6468                               | 2.8088 |
| <i>Sval1</i>     | NM_027832     | Seminal vesicle antigen-like 1                                                               | 6.2256                                | 2.8072 |
| <i>Tph1</i>      | NM_009414     | Tryptophan hydroxylase 1, transcript variant 1                                               | 3.2862                                | 2.8057 |
| <i>Spink2</i>    | NM_183284     | Serine peptidase inhibitor, Kazal type 2                                                     | 2.4912                                | 2.8008 |
| <i>Trf</i>       | NM_133977     | Transferrin                                                                                  | 6.1933                                | 2.7992 |
| <i>Hand1</i>     | NM_008213     | Heart and neural crest derivatives expressed transcript 1                                    | 6.1927                                | 2.7990 |
| <i>Cand2</i>     | NM_025958     | Cullin-associated and neddylation-dissociated 2 (putative)                                   | 2.4885                                | 2.7976 |
| <i>Gjb3</i>      | NM_001160012  | Gap junction protein, beta 3, transcript variant 1                                           | 2.0839                                | 2.7896 |
| <i>Itgb3bp</i>   | NM_026348     | Integrin beta 3 binding protein (beta3-endonexin)                                            | 2.4810                                | 2.7883 |
| <i>Aqp1</i>      | NM_007472     | Aquaporin 1                                                                                  | 2.0794                                | 2.7815 |
| <i>Prr7</i>      | NM_001030296  | Proline rich 7 (synaptic)                                                                    | 2.4700                                | 2.7747 |
| <i>Trf</i>       | NM_133977     | Transferrin                                                                                  | 3.2364                                | 2.7698 |
| <i>Cd276</i>     | NM_133983     | CD276 antigen                                                                                | 2.4608                                | 2.7633 |
| <i>Mmp13</i>     | NM_008607     | Matrix metallopeptidase 13                                                                   | 3.2059                                | 2.7475 |
| <i>Sft2d1</i>    | NM_134114     | SFT2 domain containing 1                                                                     | 5.9725                                | 2.7433 |
| <i>Tmem179</i>   | NM_178915     | Transmembrane protein 179                                                                    | 3.1985                                | 2.7421 |
| <i>Lor</i>       | NM_008508     | Loricrin                                                                                     | 2.4354                                | 2.7315 |
| <i>Spon2</i>     | NM_133903     | Spondin 2, extracellular matrix protein                                                      | 2.4335                                | 2.7291 |
| <i>Nxph3</i>     | NM_130858     | Neurexophilin 3                                                                              | 2.4292                                | 2.7237 |
| <i>Upk3b</i>     | NM_175309     | Uroplakin 3B                                                                                 | 5.8957                                | 2.7234 |
| <i>Ccdc109b</i>  | NM_025779     | Coiled-coil domain containing 109B                                                           | 2.4178                                | 2.7093 |
| <i>Wnt4</i>      | NM_009523     | Wingless-related MMTV integration site 4                                                     | 2.3931                                | 2.6778 |
| <i>Stab1</i>     | NM_138672     | Stabilin 1                                                                                   | 3.1078                                | 2.6743 |
| <i>Ngfr</i>      | NM_033217     | Nerve growth factor receptor (TNFR superfamily, member 16)                                   | 3.1076                                | 2.6742 |

| GeneSymbol          | Accession NO. | Description                                                                                              | Fold change (Atf4 <sup>-/-</sup> /WT) | Zscore |
|---------------------|---------------|----------------------------------------------------------------------------------------------------------|---------------------------------------|--------|
| <i>Nnat</i>         | NM_010923     | Neuronatin, transcript variant 1                                                                         | 3.1075                                | 2.6741 |
| <i>Icos</i>         | NM_017480     | Inducible T-cell co-stimulator                                                                           | 5.6923                                | 2.6694 |
| <i>Hoxd13</i>       | NM_008275     | Homeobox D13                                                                                             | 2.0164                                | 2.6648 |
| <i>Adcy5</i>        | NM_001012765  | Adenylate cyclase 5                                                                                      | 3.0918                                | 2.6622 |
| <i>Mdfl</i>         | NM_001109973  | MyoD family inhibitor, transcript variant 2                                                              | 2.3784                                | 2.6590 |
| <i>Uap1</i>         | NM_133806     | UDP-N-acetylglucosamine pyrophosphorylase 1                                                              | 2.0092                                | 2.6512 |
| <i>Isl2</i>         | NM_027397     | Insulin related protein 2 (islet 2)                                                                      | 3.0736                                | 2.6483 |
| <i>Crb2</i>         | NM_001163566  | Crumbs homolog 2 (Drosophila)                                                                            | 5.6085                                | 2.6466 |
| <i>Galnt6</i>       | NM_001161767  | UDP-N-acetyl-alpha-D-galactosamine:polypeptide N-acetylgalactosaminyltransferase 6, transcript variant 1 | 5.5834                                | 2.6397 |
| <i>LOC100041222</i> | NM_001160141  | Spermiogenesis specific transcript on the Y 2-like                                                       | 16.4463                               | 2.6394 |
| <i>Zfp30</i>        | NM_013705     | Zinc finger protein 30                                                                                   | 2.3604                                | 2.6357 |
| <i>Igsf1</i>        | NM_177591     | Immunoglobulin superfamily, member 1, transcript variant 1                                               | 5.5525                                | 2.6311 |
| <i>Tlx2</i>         | NM_009392     | T-cell leukemia, homeobox 2                                                                              | 5.5475                                | 2.6298 |
| <i>Olf1386</i>      | NM_001011741  | Olfactory receptor 1386                                                                                  | 16.1028                               | 2.6193 |
| <i>Hoxd12</i>       | NM_008274     | Homeobox D12                                                                                             | 3.0349                                | 2.6185 |
| <i>Elavl2</i>       | NM_207685     | ELAV (embryonic lethal, abnormal vision, Drosophila)-like 2 (Hu antigen B), transcript variant 1         | 5.5049                                | 2.6179 |
| <i>Sct</i>          | NM_011328     | Secretin                                                                                                 | 3.0243                                | 2.6103 |
| <i>Nfam1</i>        | NM_028728     | Nfat activating molecule with ITAM motif 1                                                               | 5.4774                                | 2.6102 |
| <i>Abcb1a</i>       | NM_011076     | ATP-binding cassette, sub-family B (MDR/TAP), member 1A                                                  | 3.0221                                | 2.6085 |
| <i>Arhgap25</i>     | NM_001037727  | Rho GTPase activating protein 25, transcript variant 1                                                   | 5.4599                                | 2.6053 |
| <i>Fam78b</i>       | NM_001160262  | Family with sequence similarity 78, member B, transcript variant 1                                       | 5.4511                                | 2.6028 |
| <i>Plxna2</i>       | NM_008882     | Plexin A2                                                                                                | 2.3334                                | 2.6005 |
| <i>Ccdc67</i>       | NM_181816     | Coiled-coil domain containing 67                                                                         | 15.7643                               | 2.5991 |
| <i>Tmem171</i>      | NM_001025606  | Transmembrane protein 171                                                                                | 3.0096                                | 2.5987 |
| <i>Mup20</i>        | NM_001012323  | Major urinary protein 20                                                                                 | 15.7208                               | 2.5964 |
| <i>Foxl1</i>        | NM_008024     | Forkhead box L1                                                                                          | 3.0033                                | 2.5938 |
| <i>Cox6b2</i>       | NM_183405     | Cytochrome c oxidase subunit VIb polypeptide 2, transcript variant 1                                     | 2.3196                                | 2.5823 |
| <i>Adcyap1r1</i>    | NM_007407     | Adenylate cyclase activating polypeptide 1 receptor 1, transcript variant 1                              | 2.9839                                | 2.5785 |
| <i>C1qa</i>         | NM_007572     | Complement component 1, q subcomponent, alpha polypeptide                                                | 2.9808                                | 2.5761 |
| <i>Emr1</i>         | NM_010130     | EGF-like module containing, mucin-like, hormone receptor-like sequence 1                                 | 5.3494                                | 2.5738 |
| <i>Ttc8</i>         | NM_029553     | Tetratricopeptide repeat domain 8, transcript variant 1                                                  | 2.2990                                | 2.5550 |
| <i>Etv1</i>         | NM_007960     | Ets variant gene 1, transcript variant 1                                                                 | 2.2931                                | 2.5471 |
| <i>Hist1h4c</i>     | NM_178208     | Histone cluster 1, H4c                                                                                   | 2.2930                                | 2.5470 |
| <i>Car12</i>        | NM_178396     | Carbonic anhydrase 12                                                                                    | 2.2918                                | 2.5454 |
| <i>Olf1383</i>      | NM_207574     | Olfactory receptor 1383                                                                                  | 5.2509                                | 2.5452 |
| <i>Aim1</i>         | NM_172393     | Absent in melanoma 1                                                                                     | 2.2883                                | 2.5408 |
| <i>Slc17a4</i>      | NM_177016     | Solute carrier family 17 (sodium phosphate), member 4                                                    | 14.8208                               | 2.5403 |
| <i>Megf11</i>       | NM_001134399  | Multiple EGF-like-domains 11, transcript variant 1                                                       | 14.7475                               | 2.5355 |
| <i>Slpi</i>         | NM_011414     | Secretory leukocyte peptidase inhibitor                                                                  | 2.9296                                | 2.5354 |
| <i>Clec4n</i>       | NM_020001     | C-type lectin domain family 4, member n                                                                  | 2.9219                                | 2.5292 |
| <i>Bcar3</i>        | NM_013867     | Breast cancer anti-estrogen resistance 3                                                                 | 2.2792                                | 2.5285 |
| <i>Olf979</i>       | NM_147108     | Olfactory receptor 979                                                                                   | 14.5563                               | 2.5231 |
| <i>Popdc2</i>       | NM_022318     | Popeye domain containing 2, transcript variant 2                                                         | 2.8836                                | 2.4981 |
| <i>Dfna5</i>        | NM_018769     | Deafness, autosomal dominant 5 (human)                                                                   | 2.2549                                | 2.4957 |
| <i>Rnf43</i>        | NM_172448     | Ring finger protein 43                                                                                   | 2.8746                                | 2.4907 |
| <i>Hoxa13</i>       | NM_008264     | Homeobox A13                                                                                             | 2.8639                                | 2.4819 |
| <i>Vpreb3</i>       | NM_009514     | Pre-B lymphocyte gene 3                                                                                  | 5.0319                                | 2.4797 |
| <i>Apol11b</i>      | NM_001143686  | Apolipoprotein L 11b                                                                                     | 5.0312                                | 2.4795 |
| <i>Frmpl1</i>       | NM_001081172  | FERM and PDZ domain containing 1                                                                         | 5.0182                                | 2.4755 |
| <i>Prkcb</i>        | NM_008855     | Protein kinase C, beta                                                                                   | 5.0116                                | 2.4735 |
| <i>Ikzf4</i>        | NM_011772     | IKAROS family zinc finger 4                                                                              | 2.8534                                | 2.4733 |
| <i>Hcls1</i>        | NM_008225     | Hematopoietic cell specific Lyn substrate 1                                                              | 2.8469                                | 2.4679 |
| <i>Dzip1</i>        | NM_025943     | DAZ interacting protein 1                                                                                | 4.9899                                | 2.4668 |
| <i>Wwc1</i>         | NM_170779     | WW, C2 and coiled-coil domain containing 1                                                               | 2.8368                                | 2.4595 |
| <i>Gda</i>          | NM_010266     | Guanine deaminase                                                                                        | 2.2264                                | 2.4567 |
| <i>Oas2</i>         | NM_145227     | 2'-5' oligoadenylate synthetase 2                                                                        | 4.9404                                | 2.4515 |
| <i>Ddit4l</i>       | NM_030143     | DNA-damage-inducible transcript 4-like                                                                   | 2.2219                                | 2.4505 |
| <i>Prex1</i>        | NM_177782     | Phosphatidylinositol-3,4,5-trisphosphate-dependent Rac exchange factor 1                                 | 2.8256                                | 2.4503 |
| <i>Smad9</i>        | NM_019483     | MAD homolog 9 (Drosophila)                                                                               | 2.2172                                | 2.4441 |
| <i>Vmn2r17</i>      | NM_001104628  | Vomer nasal 2, receptor 17                                                                               | 13.3297                               | 2.4393 |
| <i>C2</i>           | NM_013484     | Complement component 2 (within H-2S)                                                                     | 2.2074                                | 2.4306 |
| <i>Pygl</i>         | NM_133198     | Liver glycogen phosphorylase                                                                             | 2.2018                                | 2.4227 |
| <i>Slc14a1</i>      | NM_028122     | Solute carrier family 14 (urea transporter), member 1                                                    | 4.8389                                | 2.4195 |
| <i>Tmsb15b2</i>     | NM_001080967  | Thymosin beta 15b2                                                                                       | 2.1984                                | 2.4179 |

| GeneSymbol       | Accession NO. | Description                                                                            | Fold change (Atf4 <sup>-/-</sup> /WT) | Zscore |
|------------------|---------------|----------------------------------------------------------------------------------------|---------------------------------------|--------|
| <i>Ripk4</i>     | NM_023663     | Receptor-interacting serine-threonine kinase 4                                         | 2.7866                                | 2.4175 |
| <i>Pira7</i>     | NM_011094     | Paired-Ig-like receptor A7                                                             | 4.8028                                | 2.4080 |
| <i>Olfrl240</i>  | NM_146808     | Olfactory receptor 1240                                                                | 12.8621                               | 2.4052 |
| <i>Slc35e1</i>   | NM_177766     | Solute carrier family 35, member E1                                                    | 2.7683                                | 2.4020 |
| <i>Ahsg</i>      | NM_013465     | Alpha-2-HS-glycoprotein                                                                | 12.7818                               | 2.3993 |
| <i>Fgl1</i>      | BC029734      | Fibrinogen-like protein 1                                                              | 12.7636                               | 2.3979 |
| <i>Tgfb3</i>     | NM_011578     | Transforming growth factor, beta receptor III                                          | 2.1764                                | 2.3872 |
| <i>Gldn</i>      | NM_177350     | Gliomedin                                                                              | 2.7438                                | 2.3811 |
| <i>Epb4.9</i>    | NM_013514     | Erythrocyte protein band 4.9                                                           | 2.7422                                | 2.3797 |
| <i>Htr7</i>      | NM_008315     | 5-hydroxytryptamine (serotonin) receptor 7                                             | 2.7399                                | 2.3778 |
| <i>Svop</i>      | NM_026805     | SV2 related protein                                                                    | 4.7086                                | 2.3775 |
| <i>Myo1g</i>     | NM_178440     | Myosin IG                                                                              | 2.7392                                | 2.3772 |
| <i>Scube3</i>    | BU610818      | CUB and EGF-like domain-containing protein 3 Precursor                                 | 2.7388                                | 2.3768 |
| <i>Atoh8</i>     | NM_153778     | Atonal homolog 8 (Drosophila)                                                          | 2.1688                                | 2.3765 |
| <i>Fam40b</i>    | NM_001037740  | Family with sequence similarity 40, member B, transcript variant 2                     | 4.6812                                | 2.3686 |
| <i>Csf2rb2</i>   | NM_007781     | Colony stimulating factor 2 receptor, beta 2, low-affinity (granulocyte-macrophage)    | 4.6713                                | 2.3653 |
| <i>V1ra1</i>     | NM_011683     | Vomer nasal 1 receptor, A1                                                             | 12.2645                               | 2.3599 |
| <i>Hist1h2bp</i> | NM_178202     | Histone cluster 1, H2bp                                                                | 4.6503                                | 2.3584 |
| <i>Evi2a</i>     | NM_001033711  | Ecotropic viral integration site 2a, transcript variant 1                              | 2.7146                                | 2.3559 |
| <i>Fbxo2</i>     | NM_176848     | F-box protein 2                                                                        | 2.1504                                | 2.3503 |
| <i>Slc22a18</i>  | NM_001042760  | Solute carrier family 22 (organic cation transporter), member 18, transcript variant 2 | 2.6838                                | 2.3290 |
| <i>Jmjd7</i>     | NM_001114637  | Jumonji domain containing 7                                                            | 2.1338                                | 2.3266 |
| <i>Mbp</i>       | NM_001025245  | Myelin basic protein, transcript variant 8                                             | 2.1316                                | 2.3235 |
| <i>Nkx2-9</i>    | NM_008701     | NK2 transcription factor related, locus 9 (Drosophila)                                 | 4.5419                                | 2.3221 |
| <i>Tmem108</i>   | NM_178638     | Transmembrane protein 108                                                              | 4.5286                                | 2.3176 |
| <i>Krt81</i>     | NM_001166157  | Keratin 81                                                                             | 2.6693                                | 2.3163 |
| <i>Cetn4</i>     | NM_145825     | Centrin 4                                                                              | 2.6588                                | 2.3070 |
| <i>Cdh4</i>      | NM_009867     | Cadherin 4                                                                             | 2.6489                                | 2.2983 |
| <i>Alox5ap</i>   | NM_009663     | Arachidonate 5-lipoxygenase activating protein                                         | 2.6457                                | 2.2954 |
| <i>Chm</i>       | NM_018818     | Choroideremia                                                                          | 2.6416                                | 2.2918 |
| <i>Gent3</i>     | NM_028087     | Glucosaminyl (N-acetyl) transferase 3, mucin type                                      | 11.3709                               | 2.2879 |
| <i>Arntl</i>     | NM_007489     | Aryl hydrocarbon receptor nuclear translocator-like                                    | 2.1053                                | 2.2855 |
| <i>Madd</i>      | NM_145527     | MAP-kinase activating death domain                                                     | 4.4178                                | 2.2795 |
| <i>Myo1f</i>     | NM_053214     | Myosin IF                                                                              | 4.3791                                | 2.2659 |
| <i>Clec2d</i>    | NM_053109     | C-type lectin domain family 2, member d                                                | 2.6104                                | 2.2637 |
| <i>Bnc1</i>      | NM_007562     | Basonuclin 1                                                                           | 4.3719                                | 2.2634 |
| <i>Rspo1</i>     | NM_138683     | R-spondin homolog (Xenopus laevis)                                                     | 4.3661                                | 2.2614 |
| <i>Thsd1</i>     | NM_019576     | Thrombospondin, type I, domain 1                                                       | 2.0887                                | 2.2612 |
| <i>Rtn4r</i>     | NM_022982     | Reticulon 4 receptor                                                                   | 2.6005                                | 2.2548 |
| <i>Crem</i>      | NM_001110851  | cAMP responsive element modulator, transcript variant 7                                | 10.9510                               | 2.2520 |
| <i>Dock9</i>     | NM_001128307  | Dedicator of cytokinesis 9, transcript variant 3                                       | 4.3278                                | 2.2478 |
| <i>Vav1</i>      | NM_011691     | Vav 1 oncogene, transcript variant 1                                                   | 4.3104                                | 2.2416 |
| <i>Gng13</i>     | NM_022422     | Guanine nucleotide binding protein (G protein), gamma 13                               | 2.5843                                | 2.2401 |
| <i>Slc5a7</i>    | NM_022025     | Solute carrier family 5 (choline transporter), member 7                                | 2.5838                                | 2.2397 |
| <i>Stat5a</i>    | NM_011488     | Signal transducer and activator of transcription 5A, transcript variant 1              | 2.0726                                | 2.2375 |
| <i>Shisa2</i>    | NM_145463     | Shisa homolog 2 (Xenopus laevis)                                                       | 4.2985                                | 2.2373 |
| <i>Krt7</i>      | NM_033073     | Keratin 7                                                                              | 2.0695                                | 2.2330 |
| <i>BC049730</i>  | NM_199150     | cDNA sequence BC049730                                                                 | 10.6484                               | 2.2253 |
| <i>Rgs17</i>     | NM_001161822  | Regulator of G-protein signaling 17, transcript variant 1                              | 2.0611                                | 2.2205 |
| <i>Sox2</i>      | NM_011443     | SRY-box containing gene 2                                                              | 10.5872                               | 2.2198 |
| <i>Sprr2h</i>    | NM_011474     | Small proline-rich protein 2H                                                          | 10.5772                               | 2.2189 |
| <i>Bcl2l12</i>   | NM_029410     | BCL2-like 12 (proline rich)                                                            | 2.0580                                | 2.2160 |
| <i>Rrp8</i>      | NM_025897     | Ribosomal RNA processing 8, methyltransferase, homolog (yeast)                         | 2.0540                                | 2.2099 |
| <i>Adrbk2</i>    | NM_177078     | Adrenergic receptor kinase, beta 2, transcript variant 1                               | 4.1992                                | 2.2014 |
| <i>Dusp9</i>     | NM_029352     | Dual specificity phosphatase 9                                                         | 2.0479                                | 2.2008 |
| <i>Pira11</i>    | NM_011088     | Paired-Ig-like receptor A11                                                            | 4.1894                                | 2.1978 |
| <i>Gata4</i>     | NM_008092     | GATA binding protein 4                                                                 | 4.1846                                | 2.1960 |
| <i>Nnat</i>      | NM_010923     | Neuronatin, transcript variant 1                                                       | 2.5357                                | 2.1954 |
| <i>Tmod2</i>     | NM_001038710  | Tropomodulin 2, transcript variant 1                                                   | 2.5352                                | 2.1949 |
| <i>Mios</i>      | NM_145374     | Missing oocyte, meiosis regulator, homolog (Drosophila)                                | 2.0435                                | 2.1942 |
| <i>N4bp1</i>     | NM_030563     | NEDD4 binding protein 1                                                                | 2.5341                                | 2.1939 |
| <i>Cyth4</i>     | NM_028195     | Cytohesin 4                                                                            | 2.5334                                | 2.1933 |
| <i>Prkcb</i>     | NM_008855     | Protein kinase C, beta                                                                 | 4.1687                                | 2.1902 |
| <i>Cgn</i>       | NM_001037711  | Cingulin                                                                               | 2.5284                                | 2.1886 |
| <i>Olfrl63</i>   | NM_146937     | Olfactory receptor 63                                                                  | 10.2406                               | 2.1881 |
| <i>Fthl17</i>    | NM_031261     | Ferritin, heavy polypeptide-like 17                                                    | 10.2311                               | 2.1873 |

| GeneSymbol      | Accession NO. | Description                                                                                      | Fold change (Atf4 <sup>-/-</sup> /WT) | Zscore  |
|-----------------|---------------|--------------------------------------------------------------------------------------------------|---------------------------------------|---------|
| <i>Serpib6b</i> | NM_011454     | Serine (or cysteine) peptidase inhibitor, clade B, member 6b                                     | 2.0388                                | 2.1872  |
| <i>Vat1l</i>    | NM_173016     | Vesicle amine transport protein 1 homolog-like (T. californica)                                  | 2.5266                                | 2.1869  |
| <i>Tnni1</i>    | NM_021467     | Troponin I, skeletal, slow 1, transcript variant 1                                               | 2.5258                                | 2.1862  |
| <i>Mapk4</i>    | NM_172632     | Mitogen-activated protein kinase 4                                                               | 10.2065                               | 2.1850  |
| <i>Fas</i>      | NM_007987     | Fas (TNF receptor superfamily member 6), transcript variant 1                                    | 2.0338                                | 2.1797  |
| <i>Elavl2</i>   | NM_207685     | ELAV (embryonic lethal, abnormal vision, Drosophila)-like 2 (Hu antigen B), transcript variant 1 | 2.5137                                | 2.1749  |
| <i>Serpib2</i>  | NM_011111     | Serine (or cysteine) peptidase inhibitor, clade B, member 2                                      | 2.5134                                | 2.1746  |
| <i>Dchs1</i>    | NM_001162943  | Dachsous 1 (Drosophila)                                                                          | 2.5082                                | 2.1697  |
| <i>Tmc7</i>     | NM_172476     | Transmembrane channel-like gene family 7                                                         | 2.5045                                | 2.1662  |
| <i>Snopc1</i>   | NM_178392     | Small nuclear RNA activating complex, polypeptide 1                                              | 2.0223                                | 2.1623  |
| <i>Iqub</i>     | NM_172535     | IQ motif and ubiquitin domain containing                                                         | 9.9529                                | 2.1610  |
| <i>Stac</i>     | NM_016853     | Src homology three (SH3) and cysteine rich domain                                                | 2.4951                                | 2.1574  |
| <i>Des</i>      | NM_010043     | Desmin                                                                                           | 2.0186                                | 2.1567  |
| <i>Mgst2</i>    | NM_174995     | Microsomal glutathione S-transferase 2                                                           | 2.0180                                | 2.1558  |
| <i>Rbm47</i>    | NM_178446     | RNA binding motif protein 47, transcript variant 1                                               | 2.4932                                | 2.1556  |
| <i>Akap5</i>    | NM_001101471  | A kinase (PRKA) anchor protein 5                                                                 | 4.0702                                | 2.1534  |
| <i>Ppil5</i>    | NM_001081406  | Peptidylprolyl isomerase (cyclophilin) like 5                                                    | 2.0150                                | 2.1512  |
| <i>Sh3bgr</i>   | NM_015825     | SH3-binding domain glutamic acid-rich protein                                                    | 2.0114                                | 2.1457  |
| <i>Sh3bgr</i>   | NM_015825     | SH3-binding domain glutamic acid-rich protein                                                    | 2.0097                                | 2.1432  |
| <i>Plek2</i>    | NM_013738     | Pleckstrin 2                                                                                     | 4.0234                                | 2.1356  |
| <i>Wdfy4</i>    | NM_001146022  | WD repeat and FYVE domain containing 4                                                           | 4.0143                                | 2.1321  |
| <i>Ppih</i>     | NM_001110130  | Peptidyl prolyl isomerase H, transcript variant 3                                                | 2.4562                                | 2.1204  |
| <i>Olf461</i>   | NM_146382     | Olfactory receptor 461                                                                           | 9.5354                                | 2.1202  |
| <i>Dctd</i>     | NM_178788     | dCMP deaminase, transcript variant 1                                                             | 2.4470                                | 2.1116  |
| <i>Arap3</i>    | NM_139206     | ArfGAP with RhoGAP domain, ankyrin repeat and PH domain 3                                        | 2.4418                                | 2.1065  |
| <i>Gsdmc3</i>   | NM_183194     | Gasdermin C3                                                                                     | 9.3901                                | 2.1056  |
| <i>Folr2</i>    | NM_008035     | Folate receptor 2 (fetal)                                                                        | 3.9404                                | 2.1035  |
| <i>Pira3</i>    | NM_011090     | Paired-Ig-like receptor A3, transcript variant 1                                                 | 3.9393                                | 2.1031  |
| <i>Npffr2</i>   | NM_133192     | Neuropeptide FF receptor 2                                                                       | 9.3359                                | 2.1000  |
| <i>Tmem125</i>  | NM_172383     | Transmembrane protein 125                                                                        | 3.9294                                | 2.0992  |
| <i>Nefl</i>     | NM_010910     | Neurofilament, light polypeptide                                                                 | 3.9050                                | 2.0896  |
| <i>Rac2</i>     | NM_009008     | RAS-related C3 botulinum substrate 2                                                             | 3.8954                                | 2.0859  |
| <i>F5</i>       | NM_007976     | Coagulation factor V                                                                             | 3.8834                                | 2.0811  |
| <i>Car3</i>     | NM_007606     | Carbonic anhydrase 3                                                                             | 3.8736                                | 2.0772  |
| <i>Olf1341</i>  | NM_146853     | Olfactory receptor 1341                                                                          | 2.4107                                | 2.0764  |
| <i>Bai1</i>     | NM_174991     | Brain-specific angiogenesis inhibitor 1                                                          | 3.8552                                | 2.0699  |
| <i>Ppp1r14d</i> | NM_028104     | Protein phosphatase 1, regulatory (inhibitor) subunit 14D                                        | 9.0007                                | 2.0652  |
| <i>Gdf10</i>    | NM_145741     | Growth differentiation factor 10                                                                 | 8.9890                                | 2.0640  |
| <i>Mmel1</i>    | NM_013783     | Membrane metallo-endopeptidase-like 1                                                            | 2.3915                                | 2.0576  |
| <i>H2-Ab1</i>   | NM_207105     | Histocompatibility 2, class II antigen A, beta 1                                                 | 3.8123                                | 2.0527  |
| <i>Ankrd33b</i> | NM_026153     | Ankyrin repeat domain 33B, transcript variant 1                                                  | 8.8204                                | 2.0459  |
| <i>Tcfap2b</i>  | NM_001025305  | Transcription factor AP-2 beta, transcript variant 2                                             | 3.7928                                | 2.0448  |
| <i>Chl1</i>     | NM_007697     | Cell adhesion molecule with homology to L1CAM                                                    | 3.7902                                | 2.0437  |
| <i>Ypel1</i>    | NM_023249     | Yippee-like 1 (Drosophila)                                                                       | 3.7892                                | 2.0433  |
| <i>Olf1111</i>  | NM_146593     | Olfactory receptor 1111                                                                          | 8.7170                                | 2.0347  |
| <i>Snx10</i>    | NM_028035     | Sorting nexin 10, transcript variant 1                                                           | 2.3678                                | 2.0341  |
| <i>Rasgef1b</i> | NM_145839     | RasGEF domain family, member 1B, transcript variant 1                                            | 2.3667                                | 2.0331  |
| <i>Btk</i>      | NM_013482     | Bruton agammaglobulinemia tyrosine kinase                                                        | 3.7481                                | 2.0266  |
| <i>Kng1</i>     | NM_023125     | Kininogen, transcript variant 2                                                                  | 2.3582                                | 2.0246  |
| <i>Dynl1</i>    | NM_019682     | Dynein light chain LC8-type 1                                                                    | 2.3578                                | 2.0242  |
| <i>Rbm24</i>    | NM_001081425  | RNA binding motif protein 24                                                                     | 2.3553                                | 2.0216  |
| <i>Ank3</i>     | NM_146005     | Ankyrin 3, epithelial, transcript variant 2                                                      | 2.3531                                | 2.0195  |
| <i>Fgf2</i>     | NM_008006     | Fibroblast growth factor 2                                                                       | 2.3491                                | 2.0155  |
| <i>Nrxn2</i>    | NM_020253     | Neurexin II                                                                                      | 3.7122                                | 2.0117  |
| <i>Ctnna2</i>   | NM_009819     | Catenin (cadherin associated protein), alpha 2, transcript variant 2                             | 0.4257                                | -2.0053 |
| <i>Vmn2r78</i>  | NM_001105189  | Vomer nasal 2, receptor 78                                                                       | 0.2716                                | -2.0113 |
| <i>Gm5144</i>   | BC051480      | Hypothetical LOC381002                                                                           | 0.2713                                | -2.0128 |
| <i>Prosc</i>    | NM_001039077  | Proline synthetase co-transcribed, transcript variant 2                                          | 0.4238                                | -2.0162 |
| <i>Nap115</i>   | NM_021432     | Nucleosome assembly protein 1-like 5                                                             | 0.1233                                | -2.0217 |
| <i>Tex11</i>    | NM_031384     | Testis expressed gene 11, transcript variant 1                                                   | 0.2693                                | -2.0240 |
| <i>Gper</i>     | NM_029771     | G protein-coupled estrogen receptor 1                                                            | 0.4221                                | -2.0258 |
| <i>Slc9a10</i>  | NM_198106     | Musculus solute carrier family 9, member 10                                                      | 0.1228                                | -2.0258 |
| <i>Trpm3</i>    | NM_001035244  | Transient receptor potential cation channel, subfamily M, member 3, transcript variant 7         | 0.2689                                | -2.0265 |
| <i>Bhmt</i>     | NM_016668     | Betaine-homocysteine methyltransferase                                                           | 0.1218                                | -2.0329 |

| GeneSymbol      | Accession NO. | Description                                                                                                                         | Fold change (Atf4 <sup>-/-</sup> /WT) | Zscore  |
|-----------------|---------------|-------------------------------------------------------------------------------------------------------------------------------------|---------------------------------------|---------|
| <i>Rbl1</i>     | NM_001139516  | Retinoblastoma-like 1 (p107), transcript variant 2                                                                                  | 0.4196                                | -2.0394 |
| <i>C1qtnf7</i>  | BC090967      | Complement C1q tumor necrosis factor-related protein 7 Precursor                                                                    | 0.2661                                | -2.0426 |
| <i>Ttc9</i>     | NM_001033149  | Tetratricopeptide repeat domain 9                                                                                                   | 0.4179                                | -2.0492 |
| <i>Fam13c</i>   | NM_024244     | Family with sequence similarity 13, member C, transcript variant 1                                                                  | 0.2647                                | -2.0508 |
| <i>Tmem191c</i> | NM_177473     | Transmembrane protein 191C                                                                                                          | 0.2640                                | -2.0547 |
| <i>Egln1</i>    | NM_053207     | EGL nine homolog 1 (C. elegans)                                                                                                     | 0.2640                                | -2.0551 |
| <i>Akap6</i>    | NM_198111     | A kinase (PRKA) anchor protein 6                                                                                                    | 0.2583                                | -2.0883 |
| <i>Olfir921</i> | NM_146782     | Olfactory receptor 921                                                                                                              | 0.2582                                | -2.0891 |
| <i>Trim16</i>   | NM_053169     | Mus musculus tripartite motif-containing 16                                                                                         | 0.4989                                | -2.1239 |
| <i>Nudt6</i>    | NM_153561     | Nudix (nucleoside diphosphate linked moiety X)-type motif 6                                                                         | 0.4970                                | -2.1356 |
| <i>Sema5a</i>   | NM_009154     | Sema domain, seven thrombospondin repeats, transmembrane domain (TM) and short cytoplasmic domain 5A                                | 0.4967                                | -2.1372 |
| <i>Capsl</i>    | NM_029341     | Calcyphosine-like                                                                                                                   | 0.1072                                | -2.1545 |
| <i>Ceacam16</i> | NM_001033419  | Carcinoembryonic antigen-related cell adhesion molecule 16                                                                          | 0.1068                                | -2.1582 |
| <i>Chst2</i>    | NM_018763     | Carbohydrate sulfotransferase 2                                                                                                     | 0.4928                                | -2.1616 |
| <i>Thg1l</i>    | NM_001080969  | tRNA-histidine guanylyltransferase 1-like (S. cerevisiae)                                                                           | 0.3981                                | -2.1635 |
| <i>Ccdc80</i>   | NM_026439     | Coiled-coil domain containing 80                                                                                                    | 0.4921                                | -2.1659 |
| <i>Ugt2b1</i>   | NM_152811     | UDP glucuronosyltransferase 2 family, polypeptide B1                                                                                | 0.3967                                | -2.1716 |
| <i>Clec11a</i>  | NM_009131     | C-type lectin domain family 11, member a                                                                                            | 0.3959                                | -2.1766 |
| <i>Zfp300</i>   | NM_183185     | Zinc finger protein 300                                                                                                             | 0.1048                                | -2.1768 |
| <i>Shisa6</i>   | NM_001034874  | Shisa homolog 6 (Xenopus laevis)                                                                                                    | 0.2435                                | -2.1791 |
| <i>Slc2a6</i>   | NM_172659     | Solute carrier family 2 (facilitated glucose transporter), member 6                                                                 | 0.4885                                | -2.1884 |
| <i>Abca5</i>    | NM_147219     | ATP-binding cassette, sub-family A (ABC1), member 5                                                                                 | 0.3932                                | -2.1923 |
| <i>Xlr3b</i>    | NM_001081643  | X-linked lymphocyte-regulated 3B                                                                                                    | 0.3926                                | -2.1963 |
| <i>Abhd1</i>    | NM_021304     | Abhydrolase domain containing 1                                                                                                     | 0.3924                                | -2.1975 |
| <i>Macc1</i>    | NM_001163136  | Metastasis associated in colon cancer 1                                                                                             | 0.3921                                | -2.1993 |
| <i>Cth</i>      | NM_145953     | Cystathionase (cystathionine gamma-lyase)                                                                                           | 0.4866                                | -2.1999 |
| <i>Cmb1</i>     | NM_181588     | Carboxymethylglutaminase-like (Pseudomonas)                                                                                         | 0.3911                                | -2.2054 |
| <i>Herc3</i>    | NM_028705     | Hect domain and RLD 3                                                                                                               | 0.4852                                | -2.2092 |
| <i>Hoxb2</i>    | NM_134032     | Homeobox B2                                                                                                                         | 0.4842                                | -2.2155 |
| <i>Scnn1b</i>   | NM_011325     | Sodium channel, nonvoltage-gated 1 beta                                                                                             | 0.1005                                | -2.2163 |
| <i>Dact1</i>    | NM_021532     | Dapper homolog 1, antagonist of beta-catenin (xenopus)                                                                              | 0.3884                                | -2.2216 |
| <i>Guca1a</i>   | NM_008189     | Guanylate cyclase activator 1a (retina)                                                                                             | 0.2359                                | -2.2279 |
| <i>Ang2</i>     | NM_007449     | Angiogenin, ribonuclease A family, member 2                                                                                         | 0.3869                                | -2.2306 |
| <i>Nedd9</i>    | NM_017464     | Neural precursor cell expressed, developmentally down-regulated gene 9, transcript variant 2                                        | 0.4803                                | -2.2398 |
| <i>Fzd4</i>     | NM_008055     | Frizzled homolog 4 (Drosophila)                                                                                                     | 0.4783                                | -2.2530 |
| <i>Ctnna3</i>   | NM_001164376  | Catenin (cadherin associated protein), alpha 3, transcript variant 1                                                                | 0.0966                                | -2.2536 |
| <i>Uhrf1bp1</i> | NM_001080769  | UHRF1 (ICBP90) binding protein 1                                                                                                    | 0.2267                                | -2.2894 |
| <i>Fcgrt</i>    | NM_010189     | Fc receptor, IgG, alpha chain transporter                                                                                           | 0.4725                                | -2.2899 |
| <i>Retnlg</i>   | NM_181596     | Resistin like gamma                                                                                                                 | 0.0925                                | -2.2958 |
| <i>Defb47</i>   | NM_001039125  | Defensin beta 47                                                                                                                    | 0.2251                                | -2.2998 |
| <i>Hoxa3</i>    | NM_010452     | Homeobox A3                                                                                                                         | 0.4707                                | -2.3018 |
| <i>Rsrc2</i>    | NM_001005523  | Arginine/serine-rich coiled-coil 2, transcript variant 3                                                                            | 0.2228                                | -2.3161 |
| <i>Abca12</i>   | NM_175210     | ATP-binding cassette, sub-family A, member 12                                                                                       | 0.0905                                | -2.3162 |
| <i>Tubd1</i>    | NM_019756     | Tubulin, delta 1                                                                                                                    | 0.4678                                | -2.3207 |
| <i>Mthfd1l</i>  | NM_001170786  | Methylenetetrahydrofolate dehydrogenase (NADP+ dependent) 1-like, nuclear gene encoding mitochondrial protein, transcript variant 3 | 0.4675                                | -2.3224 |
| <i>Engase</i>   | NM_172573     | Endo-beta-N-acetylglucosaminidase                                                                                                   | 0.3718                                | -2.3242 |
| <i>Xlr4b</i>    | NM_021365     | X-linked lymphocyte-regulated 4B                                                                                                    | 0.2204                                | -2.3326 |
| <i>Afap1l2</i>  | NM_146102     | Actin filament associated protein 1-like 2                                                                                          | 0.3704                                | -2.3328 |
| <i>Relt</i>     | NM_177073     | RELT tumor necrosis factor receptor                                                                                                 | 0.4652                                | -2.3378 |
| <i>Cth</i>      | NM_145953     | Cystathionase                                                                                                                       | 0.4645                                | -2.3425 |
| <i>Fxyd2</i>    | NM_052823     | FXYD domain-containing ion transport regulator 2                                                                                    | 0.4639                                | -2.3466 |
| <i>Per2</i>     | NM_011066     | Period homolog 2 (Drosophila)                                                                                                       | 0.0873                                | -2.3503 |
| <i>Olfir870</i> | NM_146904     | Olfactory receptor 870                                                                                                              | 0.2176                                | -2.3520 |
| <i>Tnik</i>     | NM_026910     | TRAF2 and NCK interacting kinase, transcript variant 1                                                                              | 0.3674                                | -2.3525 |
| <i>Hoxb6</i>    | NM_008269     | Homeobox B6                                                                                                                         | 0.4625                                | -2.3554 |
| <i>Insig1</i>   | NM_153526     | Insulin induced gene 1                                                                                                              | 0.4590                                | -2.3786 |
| <i>Car10</i>    | NM_028296     | Carbonic anhydrase 10                                                                                                               | 0.2137                                | -2.3801 |
| <i>Gdf9</i>     | NM_008110     | Growth differentiation factor 9                                                                                                     | 0.2135                                | -2.3815 |
| <i>Vill</i>     | NM_001164567  | Villin-like, transcript variant 1                                                                                                   | 0.4580                                | -2.3856 |
| <i>Hoxc5</i>    | NM_175730     | Homeobox C5                                                                                                                         | 0.4573                                | -2.3904 |
| <i>Accn3</i>    | NM_183000     | Amiloride-sensitive cation channel 3                                                                                                | 0.3607                                | -2.3958 |
| <i>Slc16a9</i>  | NM_025807     | Solute carrier family 16 (monocarboxylic acid transporters), member 9                                                               | 0.0817                                | -2.4132 |
| <i>Adams6</i>   | NM_001081020  | A disintegrin-like and metallopeptidase (repolysin type) with thrombospondin type 1 motif, 6                                        | 0.3566                                | -2.4226 |

| GeneSymbol       | Accession NO. | Description                                                                                                                         | Fold change (Atf4 <sup>-/-</sup> /WT) | Zscore  |
|------------------|---------------|-------------------------------------------------------------------------------------------------------------------------------------|---------------------------------------|---------|
| <i>Sp8</i>       | NM_177082     | Trans-acting transcription factor 8                                                                                                 | 0.3552                                | -2.4315 |
| <i>Smcp</i>      | NM_008574     | Sperm mitochondria-associated cysteine-rich protein, nuclear gene encoding mitochondrial protein                                    | 0.0801                                | -2.4321 |
| <i>Ociad2</i>    | NM_026950     | OCIA domain containing 2                                                                                                            | 0.3551                                | -2.4326 |
| <i>Slnf2</i>     | NM_011408     | Schlafen 2                                                                                                                          | 0.3548                                | -2.4343 |
| <i>Dnajc3</i>    | NM_008929     | DnaJ (Hsp40) homolog, subfamily C, member 3 (Dnajc3)                                                                                | 0.4501                                | -2.4385 |
| <i>Samd14</i>    | NM_146025     | Sterile alpha motif domain containing 14 (Samd14), transcript variant 1                                                             | 0.4500                                | -2.4398 |
| <i>Fam132b</i>   | NM_173395     | Family with sequence similarity 132, member B                                                                                       | 0.4478                                | -2.4546 |
| <i>Nell2</i>     | NM_016743     | NEL-like 2 (chicken)                                                                                                                | 0.3503                                | -2.4644 |
| <i>Arntl2</i>    | NM_172309     | Aryl hydrocarbon receptor nuclear translocator-like 2                                                                               | 0.0773                                | -2.4670 |
| <i>Fmn1</i>      | NM_001043322  | Formin 1 (Fmn1), transcript variant 2                                                                                               | 0.0764                                | -2.4771 |
| <i>Tmem52</i>    | AK009779      | Transmembrane protein 52 Precursor                                                                                                  | 0.0763                                | -2.4784 |
| <i>Zfand5</i>    | NM_009551     | Zinc finger, AN1-type domain 5                                                                                                      | 0.3476                                | -2.4825 |
| <i>Atp10a</i>    | NM_009728     | ATPase, class V, type 10A                                                                                                           | 0.3474                                | -2.4838 |
| <i>Btbd9</i>     | NM_172618     | BTB (POZ) domain containing 9, transcript variant 2                                                                                 | 0.4405                                | -2.5051 |
| <i>Aspn</i>      | NM_025711     | Asporin                                                                                                                             | 0.4403                                | -2.5061 |
| <i>Robo1</i>     | NM_019413     | Roundabout homolog 1 (Drosophila)                                                                                                   | 0.4397                                | -2.5105 |
| <i>Fam171b</i>   | NM_175514     | Family with sequence similarity 171, member B                                                                                       | 0.4395                                | -2.5121 |
| <i>Rhbdl3</i>    | NM_139228     | Rhomboid, veinlet-like 3 (Drosophila)                                                                                               | 0.1939                                | -2.5296 |
| <i>A2bp1</i>     | NM_021477     | Ataxin 2 binding protein 1, transcript variant 2                                                                                    | 0.3400                                | -2.5346 |
| <i>Tlr1</i>      | NM_030682     | Toll-like receptor 1                                                                                                                | 0.1920                                | -2.5448 |
| <i>Palmd</i>     | NM_023245     | Palmdelphin                                                                                                                         | 0.3365                                | -2.5591 |
| <i>Slnf10</i>    | NM_181542     | Schlafen 10                                                                                                                         | 0.3347                                | -2.5716 |
| <i>Tmem188</i>   | NM_029074     | Transmembrane protein 188                                                                                                           | 0.4303                                | -2.5763 |
| <i>Pcdh9</i>     | NM_001081377  | Protocadherin 9                                                                                                                     | 0.3326                                | -2.5864 |
| <i>Nr1d1</i>     | NM_145434     | Nuclear receptor subfamily 1, group D, member 1                                                                                     | 0.3324                                | -2.5876 |
| <i>Orm3</i>      | NM_013623     | Orosomucoid 3                                                                                                                       | 0.0673                                | -2.5978 |
| <i>Pkhd11l1</i>  | NM_138674     | Polycystic kidney and hepatic disease 1-like 1                                                                                      | 0.1842                                | -2.6086 |
| <i>P4ha3</i>     | NM_177161     | Procollagen-proline, 2-oxoglutarate 4-dioxygenase, alpha polypeptide III                                                            | 0.4248                                | -2.6163 |
| <i>Fxyd2</i>     | NM_052823     | FXD domain-containing ion transport regulator 2, transcript variant b                                                               | 0.4241                                | -2.6213 |
| <i>Ucp3</i>      | NM_009464     | Uncoupling protein 3, nuclear gene encoding mitochondrial protein                                                                   | 0.4229                                | -2.6301 |
| <i>Pcsk2</i>     | NM_008792     | Protein convertase subtilisin/kexin type 2                                                                                          | 0.3262                                | -2.6324 |
| <i>Spop</i>      | NM_025287     | Speckle-type POZ protein                                                                                                            | 0.4982                                | -2.6401 |
| <i>Epha3</i>     | NM_010140     | Eph receptor A3                                                                                                                     | 0.3248                                | -2.6426 |
| <i>Nrn1</i>      | NM_153529     | Neuritin 1                                                                                                                          | 0.3230                                | -2.6551 |
| <i>Dact1</i>     | AK077691      | Dapper homolog 1 (Thymus-expressed novel gene 3 protein)                                                                            | 0.3218                                | -2.6643 |
| <i>V1rb3</i>     | NM_053226     | Vomer nasal 1 receptor, B3                                                                                                          | 0.1763                                | -2.6756 |
| <i>Rnaseh2b</i>  | NM_026001     | Ribonuclease H2, subunit B                                                                                                          | 0.4923                                | -2.6853 |
| <i>Mthfd1l</i>   | NM_172308     | Methylenetetrahydrofolate dehydrogenase (NADP+ dependent) 1-like, nuclear gene encoding mitochondrial protein, transcript variant 2 | 0.4908                                | -2.6971 |
| <i>Olfir978</i>  | NM_147105     | Olfactory receptor 978                                                                                                              | 0.3150                                | -2.7144 |
| <i>Gpr18</i>     | NM_182806     | G protein-coupled receptor 18                                                                                                       | 0.0594                                | -2.7178 |
| <i>Ptprb</i>     | NM_029928     | Protein tyrosine phosphatase, receptor type, B                                                                                      | 0.4109                                | -2.7178 |
| <i>Cpxm2</i>     | NM_018867     | Carboxypeptidase X 2                                                                                                                | 0.1711                                | -2.7217 |
| <i>Kif26b</i>    | NM_001161665  | Kinesin family member 26B                                                                                                           | 0.4103                                | -2.7223 |
| <i>Serpina3n</i> | NM_009252     | Serine (or cysteine) peptidase inhibitor, clade A, member 3N                                                                        | 0.1708                                | -2.7245 |
| <i>Pip</i>       | NM_008843     | Prolactin induced protein                                                                                                           | 0.0587                                | -2.7293 |
| <i>Fam59b</i>    | NM_001167879  | Family with sequence similarity 59, member B                                                                                        | 0.4082                                | -2.7380 |
| <i>Car11</i>     | NM_009800     | Carbonic anhydrase 11                                                                                                               | 0.3117                                | -2.7392 |
| <i>Psd3</i>      | NM_177698     | Pleckstrin and Sec7 domain containing 3, transcript variant 2                                                                       | 0.4068                                | -2.7485 |
| <i>Mgst3</i>     | NM_025569     | Microsomal glutathione S-transferase 3                                                                                              | 0.4841                                | -2.7491 |
| <i>Raet1a</i>    | NM_009016     | Retinoic acid early transcript 1, alpha (Raet1a), mRNA [NM_009016]                                                                  | 0.3095                                | -2.7557 |
| <i>Tnfrsf11b</i> | NM_008764     | Tumor necrosis factor receptor superfamily, member 11b (osteoprotegerin)                                                            | 0.4828                                | -2.7589 |
| <i>Exoc8</i>     | NM_198103     | Exocyst complex component 8                                                                                                         | 0.4051                                | -2.7613 |
| <i>Heyl</i>      | NM_013905     | Hairy/enhancer-of-split related with YRPW motif-like                                                                                | 0.1654                                | -2.7737 |
| <i>Wbscr17</i>   | NM_145218     | Williams-Beuren syndrome chromosome region 17 homolog (human)                                                                       | 0.4777                                | -2.7992 |
| <i>Skint5</i>    | NM_001167878  | Selection and upkeep of intraepithelial T cells 5, transcript variant 2                                                             | 0.0540                                | -2.8079 |
| <i>Myo7a</i>     | NM_008663     | Myosin VIIA                                                                                                                         | 0.2977                                | -2.8478 |
| <i>FasL</i>      | NM_010177     | Fas ligand (TNF superfamily, member 6)                                                                                              | 0.0514                                | -2.8542 |
| <i>Rpl21</i>     | NM_019647     | Ribosomal protein L21                                                                                                               | 0.2962                                | -2.8595 |
| <i>Tmem204</i>   | NM_001001183  | Transmembrane protein 204                                                                                                           | 0.1541                                | -2.8826 |
| <i>Alx1</i>      | NM_172553     | ALX homeobox 1                                                                                                                      | 0.1539                                | -2.8854 |
| <i>Tnfrsf18</i>  | NM_183391     | Tumor necrosis factor (ligand) superfamily, member 18                                                                               | 0.0496                                | -2.8884 |
| <i>Bhlhe40</i>   | NM_011498     | Basic helix-loop-helix family, member e40                                                                                           | 0.3878                                | -2.8951 |
| <i>Gjb2</i>      | NM_008125     | Gap junction protein, beta 2                                                                                                        | 0.4634                                | -2.9148 |
| <i>Plcl1</i>     | NM_001114663  | Phospholipase C-like 1                                                                                                              | 0.2886                                | -2.9202 |

| GeneSymbol       | Accession NO. | Description                                                                                       | Fold change (Atf4 <sup>-/-</sup> /WT) | Zscore  |
|------------------|---------------|---------------------------------------------------------------------------------------------------|---------------------------------------|---------|
| <i>Ucp2</i>      | NM_011671     | Uncoupling protein 2 (mitochondrial, proton carrier), nuclear gene encoding mitochondrial protein | 0.3805                                | -2.9537 |
| <i>Col8a1</i>    | NM_007739     | Collagen, type VIII, alpha 1                                                                      | 0.4558                                | -2.9777 |
| <i>Gpr155</i>    | NM_001080707  | G protein-coupled receptor 155                                                                    | 0.1439                                | -2.9882 |
| <i>Skap1</i>     | NM_001033186  | Src family associated phosphoprotein 1                                                            | 0.1433                                | -2.9946 |
| <i>Rspo2</i>     | NM_172815     | R-spondin 2 homolog ( <i>Xenopus laevis</i> )                                                     | 0.3708                                | -3.0323 |
| <i>Akr1e1</i>    | NM_018859     | Aldo-keto reductase family 1, member E1                                                           | 0.3697                                | -3.0418 |
| <i>Camk2b</i>    | NM_007595     | Calcium/calmodulin-dependent protein kinase II, beta                                              | 0.1388                                | -3.0438 |
| <i>Nrg2</i>      | NM_001167891  | Mus musculus neuregulin 2                                                                         | 0.1371                                | -3.0631 |
| <i>Arsk</i>      | NM_029847     | Arylsulfatase K                                                                                   | 0.2712                                | -3.0674 |
| <i>Isoc2b</i>    | NM_026158     | Isochorismatase domain containing 2b                                                              | 0.2711                                | -3.0682 |
| <i>C1qtnf3</i>   | NM_030888     | C1q and tumor necrosis factor related protein 3                                                   | 0.3642                                | -3.0876 |
| <i>Ppm1e</i>     | NM_177167     | Protein phosphatase 1E (PP2C domain containing)                                                   | 0.1348                                | -3.0890 |
| <i>Itga7</i>     | NM_008398     | Integrin alpha 7                                                                                  | 0.4419                                | -3.0954 |
| <i>Nonagouti</i> | NM_015770     | Nonagouti (a)                                                                                     | 0.0395                                | -3.1058 |
| <i>Eppk1</i>     | NM_144848     | Epiplakin 1                                                                                       | 0.2648                                | -3.1234 |
| <i>Npr3</i>      | NM_008728     | Natriuretic peptide receptor 3, transcript variant 1                                              | 0.2644                                | -3.1270 |
| <i>Xlr4a</i>     | NM_001081642  | X-linked lymphocyte-regulated 4A                                                                  | 0.1307                                | -3.1368 |
| <i>Copz2</i>     | NM_019877     | Coatamer protein complex, subunit zeta 2                                                          | 0.4322                                | -3.1795 |
| <i>Klf13</i>     | NM_021366     | Kruppel-like factor 13                                                                            | 0.4301                                | -3.1975 |
| <i>Mc3r</i>      | NM_008561     | Melanocortin 3 receptor                                                                           | 0.3513                                | -3.1979 |
| <i>Wdr52</i>     | NM_001033247  | WD repeat domain 52                                                                               | 0.0358                                | -3.1988 |
| <i>Cry2</i>      | NM_009963     | Cryptochrome 2, transcript variant 1                                                              | 0.4293                                | -3.2045 |
| <i>Il6</i>       | NM_031168     | Interleukin 6                                                                                     | 0.2553                                | -3.2095 |
| <i>Pcdh18</i>    | NM_130448     | Protocadherin 18                                                                                  | 0.4278                                | -3.2185 |
| <i>Uap111</i>    | NM_001033293  | UDP-N-acetylglucosamine pyrophosphorylase 1-like 1                                                | 0.4246                                | -3.2465 |
| <i>Tmem41b</i>   | NM_153525     | Transmembrane protein 41B                                                                         | 0.4243                                | -3.2493 |
| <i>Gatad1</i>    | NM_026033     | GATA zinc finger domain containing 1                                                              | 0.4232                                | -3.2592 |
| <i>Ccdc151</i>   | NM_001163787  | Mus musculus coiled-coil domain containing 151, transcript variant 1                              | 0.2475                                | -3.2825 |
| <i>Itgb1</i>     | NM_145467     | Integrin, beta-like 1                                                                             | 0.3405                                | -3.2933 |
| <i>Fap</i>       | NM_007986     | Fibroblast activation protein                                                                     | 0.3358                                | -3.3356 |
| <i>Megf10</i>    | NM_001001979  | EGF-like-domains 10                                                                               | 0.3358                                | -3.3362 |
| <i>Pnpo</i>      | NM_134021     | Pyridoxine 5'-phosphate oxidase                                                                   | 0.4128                                | -3.3531 |
| <i>Edil3</i>     | NM_010103     | EGF-like repeats and discoidin I-like domains 3, transcript variant 2                             | 0.3312                                | -3.3778 |
| <i>Fam101b</i>   | NM_029658     | Family with sequence similarity 101, member B                                                     | 0.3293                                | -3.3958 |
| <i>Plekha4</i>   | NM_148927     | Pleckstrin homology domain containing, family A (phosphoinositide binding specific) member 4      | 0.2358                                | -3.3959 |
| <i>Arntl2</i>    | AK019506      | Aryl hydrocarbon receptor nuclear translocator-like protein 2 (Brain and muscle ARNT-like 2)      | 0.3285                                | -3.4033 |
| <i>Ch25h</i>     | NM_009890     | Cholesterol 25-hydroxylase                                                                        | 0.3273                                | -3.4145 |
| <i>Klhdc5</i>    | NM_001081237  | Kelch domain containing 5                                                                         | 0.3268                                | -3.4188 |
| <i>Ctsk</i>      | NM_007802     | Cathepsin K                                                                                       | 0.4053                                | -3.4235 |
| <i>Slc12a5</i>   | NM_020333     | Solute carrier family 12, member 5 (Slc12a5)                                                      | 0.1082                                | -3.4270 |
| <i>Rdh8</i>      | NM_001030290  | Retinol dehydrogenase 8                                                                           | 0.2326                                | -3.4283 |
| <i>Eif2s2</i>    | NM_026030     | Eukaryotic translation initiation factor 2, subunit 2 (beta)                                      | 0.4036                                | -3.4388 |
| <i>Tgfb1i1</i>   | NM_009365     | Transforming growth factor beta 1 induced transcript 1                                            | 0.4985                                | -3.5079 |
| <i>Kif3a</i>     | NM_008443     | Kinesin family member 3A                                                                          | 0.3172                                | -3.5107 |
| <i>Tac1</i>      | NM_009311     | Tachykinin 1                                                                                      | 0.1017                                | -3.5219 |
| <i>Lbx1</i>      | AK144562      | Transcription factor LBX1 (Ladybird homeobox protein homolog 1)                                   | 0.2213                                | -3.5458 |
| <i>Hspb2</i>     | NM_024441     | Heat shock protein 2, transcript variant 1                                                        | 0.3135                                | -3.5463 |
| <i>Pkp1</i>      | NM_019645     | Plakophilin 1                                                                                     | 0.3134                                | -3.5472 |
| <i>Mgst3</i>     | NM_025569     | Microsomal glutathione S-transferase 3                                                            | 0.3887                                | -3.5818 |
| <i>Iqgap2</i>    | NM_027711     | IQ motif containing GTPase activating protein 2                                                   | 0.0971                                | -3.5939 |
| <i>Lama4</i>     | NM_010681     | Laminin, alpha 4                                                                                  | 0.3856                                | -3.6122 |
| <i>Lrrc15</i>    | NM_028973     | Leucine rich repeat containing 15                                                                 | 0.3839                                | -3.6293 |
| <i>Mgll</i>      | NM_001166250  | Monoglyceride lipase, transcript variant 4                                                        | 0.3013                                | -3.6681 |
| <i>Sp110</i>     | NM_175397     | Sp110 nuclear body protein                                                                        | 0.0924                                | -3.6696 |
| <i>Sphk1</i>     | NM_025367     | Sphingosine kinase 1 (Sphk1), transcript variant 2                                                | 0.4775                                | -3.7248 |
| <i>B4galnt3</i>  | NM_020579     | UDP-Gal:betaGlcNAc beta 1,4-galactosyltransferase, polypeptide 3                                  | 0.3714                                | -3.7550 |
| <i>Cwc22</i>     | NM_030560     | CWC22 spliceosome-associated protein homolog ( <i>S. cerevisiae</i> )                             | 0.3699                                | -3.7698 |
| <i>Col8a2</i>    | NM_199473     | Collagen, type VIII, alpha 2                                                                      | 0.2011                                | -3.7705 |
| <i>Rbp1</i>      | NM_011254     | Retinol binding protein 1                                                                         | 0.4722                                | -3.7811 |
| <i>Mtmt14</i>    | NM_026849     | Myotubularin related protein 14                                                                   | 0.0855                                | -3.7893 |
| <i>Sema7a</i>    | NM_011352     | Sema domain, immunoglobulin domain, and GPI membrane anchor 7A                                    | 0.2894                                | -3.7916 |
| <i>Htr2a</i>     | NM_172812     | 5-hydroxytryptamine (serotonin) receptor 2A                                                       | 0.2878                                | -3.8084 |
| <i>Slco4a1</i>   | NM_148933     | Solute carrier organic anion transporter family, member 4a1                                       | 0.3644                                | -3.8272 |
| <i>Arc</i>       | NM_018790     | Activity regulated cytoskeletal-associated protein                                                | 0.1930                                | -3.8679 |

| GeneSymbol      | Accession NO. | Description                                                                      | Fold change (Atf4 <sup>-/-</sup> /WT) | Zscore   |
|-----------------|---------------|----------------------------------------------------------------------------------|---------------------------------------|----------|
| <i>Mid1</i>     | NM_183151     | Midline 1, transcript variant 2                                                  | 0.1928                                | -3.8702  |
| <i>Nr1d2</i>    | BC096461      | Nuclear receptor subfamily 1, group D, member 2                                  | 0.2770                                | -3.9253  |
| <i>Dnm1</i>     | NM_010065     | Dynamin 1                                                                        | 0.4574                                | -3.9413  |
| <i>Trnt1</i>    | NM_027296     | tRNA nucleotidyl transferase, CCA-adding, 1                                      | 0.1858                                | -3.9575  |
| <i>Wisp1</i>    | NM_018865     | WNT1 inducible signaling pathway protein 1                                       | 0.3466                                | -4.0166  |
| <i>Diap3</i>    | NM_019670     | Diaphanous homolog 3 (Drosophila)                                                | 0.2683                                | -4.0227  |
| <i>Bcat2</i>    | NM_009737     | Branched chain aminotransferase 2, nuclear gene encoding mitochondrial protein   | 0.3460                                | -4.0231  |
| <i>Pde8b</i>    | NM_001170669  | Phosphodiesterase 8B, transcript variant 1                                       | 0.2649                                | -4.0626  |
| <i>Acsl6</i>    | NM_001033599  | Acyl-CoA synthetase long-chain family member 6, transcript variant 4             | 0.0715                                | -4.0649  |
| <i>Fibin</i>    | NM_026271     | Fin bud initiation factor homolog (zebrafish)                                    | 0.3411                                | -4.0776  |
| <i>C1qtnf3</i>  | NM_030888     | C1q and tumor necrosis factor related protein 3                                  | 0.3406                                | -4.0835  |
| <i>Mgll</i>     | NM_001166251  | Monoglyceride lipase, transcript variant 1                                       | 0.3386                                | -4.1055  |
| <i>Mid1</i>     | NM_183151     | Midline 1, transcript variant 2                                                  | 0.1720                                | -4.1384  |
| <i>Atp10d</i>   | NM_153389     | ATPase, class V, type 10D                                                        | 0.1667                                | -4.2120  |
| <i>Mbl2</i>     | NM_010776     | Mannose-binding lectin 2                                                         | 0.0614                                | -4.2978  |
| <i>Mgll</i>     | NM_001166251  | Monoglyceride lipase, transcript variant 1                                       | 0.3214                                | -4.3031  |
| <i>Ceacam12</i> | NM_026087     | Carcinoembryonic antigen-related cell adhesion molecule 12, transcript variant 1 | 0.0584                                | -4.3758  |
| <i>Copz2</i>    | NM_019877     | Coatomer protein complex, subunit zeta 2                                         | 0.2383                                | -4.3863  |
| <i>Prkca</i>    | NM_008859     | Protein kinase C                                                                 | 0.0566                                | -4.4230  |
| <i>Mfap4</i>    | NM_029568     | Microfibrillar-associated protein 4                                              | 0.3112                                | -4.4253  |
| <i>Prm1</i>     | NM_013637     | Protamine 1                                                                      | 0.0551                                | -4.4662  |
| <i>Has2</i>     | NM_008216     | Hyaluronan synthase 2                                                            | 0.3074                                | -4.4722  |
| <i>Adrb3</i>    | NM_013462     | Adrenergic receptor, beta 3                                                      | 0.1479                                | -4.4941  |
| <i>Cyp51</i>    | NM_020010     | Cytochrome P450, family 51                                                       | 0.2297                                | -4.4994  |
| <i>Rgl1</i>     | NM_016846     | Ral guanine nucleotide dissociation stimulator,-like 1                           | 0.3045                                | -4.5086  |
| <i>Otud7a</i>   | NM_130880     | OTU domain containing 7A                                                         | 0.1460                                | -4.5252  |
| <i>Tef</i>      | NM_017376     | Thyrotroph embryonic factor, transcript variant 1                                | 0.3027                                | -4.5305  |
| <i>Sept12</i>   | AK006458      | septin 12                                                                        | 0.0523                                | -4.5460  |
| <i>Col4a6</i>   | NM_053185     | Collagen, type IV, alpha 6                                                       | 0.0508                                | -4.5907  |
| <i>Cx3cl1</i>   | NM_009142     | Chemokine (C-X3-C motif) ligand 1                                                | 0.2965                                | -4.6087  |
| <i>Klhl30</i>   | NM_027551     | Kelch-like 30 (Drosophila)                                                       | 0.2214                                | -4.6109  |
| <i>Wisp1</i>    | NM_018865     | WNT1 inducible signaling pathway protein 1                                       | 0.3929                                | -4.7054  |
| <i>Iqaj</i>     | NM_177585     | IQ motif containing J                                                            | 0.0445                                | -4.7933  |
| <i>Sim2</i>     | NM_011377     | Single-minded homolog 2 (Drosophila)                                             | 0.2038                                | -4.8655  |
| <i>Zdhhc23</i>  | NM_001007460  | Zinc finger, DHHC domain containing 23                                           | 0.1252                                | -4.8867  |
| <i>Crip1</i>    | NM_007763     | Cysteine-rich protein 1 (intestinal)                                             | 0.3662                                | -5.0608  |
| <i>Phyhip</i>   | NM_145981     | Phytanoyl-CoA hydroxylase interacting protein                                    | 0.0361                                | -5.1137  |
| <i>Flt1</i>     | NM_010228     | FMS-like tyrosine kinase 1                                                       | 0.2595                                | -5.1146  |
| <i>Plac9</i>    | NM_207229     | Placenta specific 9                                                              | 0.3613                                | -5.1281  |
| <i>Nr4a1</i>    | NM_010444     | Nuclear receptor subfamily 4, group A, member 1                                  | 0.3477                                | -5.3219  |
| <i>Gbp1</i>     | NM_010259     | Guanylate binding protein 1                                                      | 0.0315                                | -5.3245  |
| <i>Abcg3</i>    | NM_030239     | ATP-binding cassette, sub-family G (WHITE), member 3                             | 0.0308                                | -5.3594  |
| <i>Cd44</i>     | NM_009851     | CD44 antigen (Cd44), transcript variant 1                                        | 0.2429                                | -5.3658  |
| <i>Clec9a</i>   | NM_172732     | C-type lectin domain family 9, member a                                          | 0.0303                                | -5.3864  |
| <i>Tox4</i>     | NM_023434     | TOX high mobility group box family member 4                                      | 0.3408                                | -5.4218  |
| <i>Inpp5e</i>   | NM_033134     | Inositol polyphosphate-5-phosphatase E                                           | 0.1697                                | -5.4262  |
| <i>Oas1h</i>    | NM_145228     | 2'-5' oligoadenylate synthetase 1H, transcript variant 1                         | 0.0277                                | -5.5208  |
| <i>Apol10b</i>  | NM_177820     | Apolipoprotein L 10b                                                             | 0.0947                                | -5.5433  |
| <i>Per3</i>     | NM_011067     | Period homolog 3 (Drosophila)                                                    | 0.0935                                | -5.5740  |
| <i>Dbp</i>      | NM_016974     | D-site albumin promoter binding protein                                          | 0.1530                                | -5.7431  |
| <i>Gbp1</i>     | NM_010259     | Guanylate binding protein 1                                                      | 0.0221                                | -5.8698  |
| <i>Timm9</i>    | BC028435      | Translocase of inner mitochondrial membrane 9 homolog (yeast)                    | 0.1451                                | -5.9063  |
| <i>Wisp2</i>    | NM_016873     | WNT1 inducible signaling pathway protein 2                                       | 0.2053                                | -6.0046  |
| <i>Vmn2r121</i> | NM_001100616  | Vomer nasal 2, receptor 121                                                      | 0.0703                                | -6.2444  |
| <i>Fxyd6</i>    | NM_022004     | FXD domain-containing ion transport regulator 6                                  | 0.1613                                | -6.9198  |
| <i>Apcs</i>     | NM_011318     | Serum amyloid P-component                                                        | 0.0111                                | -6.9356  |
| <i>Ysk4</i>     | NM_011737     | Yeast Sps1/Ste20-related kinase 4 (S. cerevisiae)                                | 0.0389                                | -7.6369  |
| <i>Pop4</i>     | NM_025390     | Processing of precursor 4, ribonuclease P/MRP family, (S. cerevisiae)            | 0.1050                                | -8.5488  |
| <i>H60a</i>     | NM_010400     | Histocompatibility 60a                                                           | 0.0024                                | -9.3090  |
| <i>Il4ra</i>    | NM_001008700  | Interleukin 4 receptor, alpha                                                    | 0.0156                                | -9.7866  |
| <i>Tmem14c</i>  | NM_025387     | Transmembrane protein 14C                                                        | 0.0150                                | -12.8611 |
| <i>Syt10</i>    | NM_018803     | Synaptotagmin X                                                                  | 0.0155                                | -15.8160 |
