# Supplementary material
Source: PubMed Central journal article supplement (PMC3173173)
Supplement: supp_M111.258970_jbc.M111.258970-5.pdf [file supp_M111.258970_jbc.M111.258970-5.pdf]

**Table S4 Statistical significance KEGG classification (P<0.05) of the differentially expressed genes between wild-type and *Atf4*<sup>-/-</sup> MEFs**

| Category<br>(P-value)                                           | Gene symbol             | Accession NO. | Fold change* |
|-----------------------------------------------------------------|-------------------------|---------------|--------------|
| Circadian rhythm<br>(P=0.000059)                                | <i>Bmal1 (Arntl)</i>    | NM_007489     | 2.105        |
|                                                                 | <i>Dec1 (Bhlhe40)</i>   | NM_011498     | 0.388        |
|                                                                 | <i>Cry2</i>             | NM_009963     | 0.429        |
|                                                                 | <i>Rev-erba (Nrd1d)</i> | NM_145434     | 0.332        |
|                                                                 | <i>Per2</i>             | NM_011066     | 0.087        |
|                                                                 | <i>Per3</i>             | NM_011067     | 0.094        |
| Melanogenesis<br>(P=0.0096)                                     | <i>Adcy5</i>            | NM_001012765  | 0.309        |
|                                                                 | <i>Camk2b</i>           | NM_007595     | 0.138        |
|                                                                 | <i>Fzd2</i>             | NM_020510     | 0.379        |
|                                                                 | <i>Fzd4</i>             | NM_008055     | 0.478        |
|                                                                 | <i>Nonagouti</i>        | NM_015770     | 0.039        |
|                                                                 | <i>Prkcb</i>            | NM_008855     | 0.501        |
|                                                                 | <i>Wnt8b</i>            | NM_011720     | 6.213        |
|                                                                 | <i>Wnt16</i>            | NM_053116     | 3.698        |
|                                                                 | <i>Wnt4</i>             | NM_009523     | 2.393        |
| <i>Wnt5b</i>                                                    | NM_009525               | 2.830         |              |
| Retinol metabolism<br>(P=0.011)                                 | <i>Ugt2b1</i>           | NM_152811     | 0.397        |
|                                                                 | <i>Aldh1a1</i>          | NM_013467     | 4.772        |
|                                                                 | <i>Bcmo1</i>            | NM_021486     | 31.089       |
|                                                                 | <i>Cyp26b1</i>          | NM_175475     | 4.805        |
|                                                                 | <i>Dhrs3</i>            | NM_011303     | 2.760        |
|                                                                 | <i>Rdh8</i>             | NM_001030290  | 0.233        |
|                                                                 | <i>Cyp4a32</i>          | NM_001100181  | 24.941       |
| <i>Ugt1a6a</i>                                                  | NM_145079               | 3.304         |              |
| Arrhythmogenic right ventricular<br>cardiomyopathy<br>(P=0.018) | <i>Cttna2</i>           | NM_009819     | 0.426        |
|                                                                 | <i>Cttna3</i>           | NM_001164376  | 0.097        |
|                                                                 | <i>Des</i>              | NM_010043     | 2.019        |
|                                                                 | <i>Dsp</i>              | NM_023842     | 8.143        |
|                                                                 | <i>Dmd</i>              | NM_007868     | 9.353        |
|                                                                 | <i>Itga1</i>            | NM_001033228  | 3.872        |
|                                                                 | <i>Itga7</i>            | NM_008398     | 0.442        |
| <i>Sgca</i>                                                     | NM_009161               | 13.595        |              |
| ABC transporter<br>(P=0.022)                                    | <i>Abca12</i>           | NM_175210     | 0.091        |
|                                                                 | <i>Abca5</i>            | NM_147219     | 0.393        |
|                                                                 | <i>Abcb1a</i>           | NM_011076     | 3.022        |
|                                                                 | <i>Abcb1a</i>           | NM_011075     | 2.456        |
|                                                                 | <i>Abcb4</i>            | NM_008830     | 3.196        |
| <i>Abcg3</i>                                                    | NM_030239               | 0.031         |              |
| Xenobiotic metabolism<br>(P=0.032)                              | <i>Ugt2b1</i>           | NM_152811     | 0.397        |
|                                                                 | <i>Gsta1</i>            | NM_008181     | 4.763        |
|                                                                 | <i>Gsta2</i>            | NM_008182     | 5.029        |
|                                                                 | <i>Gsta4</i>            | NM_010357     | 2.712        |
|                                                                 | <i>Mgst2</i>            | NM_174995     | 2.018        |
|                                                                 | <i>Mgst3</i>            | NM_025569     | 0.481        |
|                                                                 | <i>Ugt1a6a</i>          | NM_145079     | 3.304        |
| Hypertrophic cardiomyopathy<br>(P=0.032)                        | <i>Actc1</i>            | NM_009608     | 10.533       |
|                                                                 | <i>Des</i>              | NM_010043     | 2.019        |
|                                                                 | <i>Dmd</i>              | NM_007868     | 9.353        |
|                                                                 | <i>Itga1</i>            | NM_001033228  | 3.871        |
|                                                                 | <i>Itga7</i>            | NM_008398     | 0.442        |
|                                                                 | <i>Il6</i>              | NM_031168     | 0.255        |
|                                                                 | <i>Sgca</i>             | NM_009161     | 13.595       |
| <i>Tpm1</i>                                                     | NM_001164248            | 2.435         |              |
| Hedgehog signaling pathway<br>(P=0.045)                         | <i>Bmp8b</i>            | NM_007559     | 4.969        |
|                                                                 | <i>Dhh</i>              | NM_007857     | 4.288        |
|                                                                 | <i>Wnt8b</i>            | NM_011720     | 6.213        |
|                                                                 | <i>Wnt16</i>            | NM_053116     | 3.698        |
|                                                                 | <i>Wnt4</i>             | NM_009523     | 2.393        |
| <i>Wnt5b</i>                                                    | NM_009525               | 2.830         |              |

Fold change is gene expression in ATF4<sup>-/-</sup> MEFs relative to wild-type.
